# Supplementary material for: The Association between Blood Test Trends and Undiagnosed Cancer: A Systematic Review and Critical Appraisal
Source: MDPI journal article supplement (doi:10.3390/cancers16091692), 2024-04-26
Supplement: s1 [file s1]

**Table S1: Final search strategy (MEDLINE)**

| <b>MEDLINE</b>                                                                                                                                                                                               |                                                                                                                                                                                                                                                                                                                                       |
|--------------------------------------------------------------------------------------------------------------------------------------------------------------------------------------------------------------|---------------------------------------------------------------------------------------------------------------------------------------------------------------------------------------------------------------------------------------------------------------------------------------------------------------------------------------|
| Database and platform: Medline (Ovid MEDLINE® Epub Ahead of Print, In-Process & Other Non-Indexed Citations, Ovid MEDLINE® Daily and Ovid MEDLINE®) 1946 to present. Search date: 15 <sup>th</sup> May 2023. |                                                                                                                                                                                                                                                                                                                                       |
| 1                                                                                                                                                                                                            | exp Neoplasms/bl [Blood]                                                                                                                                                                                                                                                                                                              |
| 2                                                                                                                                                                                                            | exp Neoplasms/                                                                                                                                                                                                                                                                                                                        |
| 3                                                                                                                                                                                                            | (neoplas* or tumor* or tumour* or cancer* or malignan* or carcino* or sarcom* or leukaem* or leukem* or lymphom* or melano* or metasta* or mesothelio* or mesotelio* or carcinomatos* or gliom* or glioblastom* or osteosarcom* or blastom* or neuroblastom* or oncolog* or myelodysplas* or adenocarcinoma* or choriocarcinoma*).ti. |
| 4                                                                                                                                                                                                            | 2 or 3                                                                                                                                                                                                                                                                                                                                |
| 5                                                                                                                                                                                                            | Hematologic Tests/                                                                                                                                                                                                                                                                                                                    |
| 6                                                                                                                                                                                                            | exp Blood Cell Count/                                                                                                                                                                                                                                                                                                                 |
| 7                                                                                                                                                                                                            | exp Blood Cells/an                                                                                                                                                                                                                                                                                                                    |
| 8                                                                                                                                                                                                            | Blood Sedimentation/                                                                                                                                                                                                                                                                                                                  |
| 9                                                                                                                                                                                                            | Blood Viscosity/                                                                                                                                                                                                                                                                                                                      |
| 10                                                                                                                                                                                                           | exp Hemoglobins/an, bl                                                                                                                                                                                                                                                                                                                |
| 11                                                                                                                                                                                                           | Hematocrit/                                                                                                                                                                                                                                                                                                                           |
| 12                                                                                                                                                                                                           | Erythrocyte Indices/ or Erythrocytes/an, bl                                                                                                                                                                                                                                                                                           |
| 13                                                                                                                                                                                                           | platelet function tests/ or mean platelet volume/                                                                                                                                                                                                                                                                                     |
| 14                                                                                                                                                                                                           | Liver Function Tests/                                                                                                                                                                                                                                                                                                                 |
| 15                                                                                                                                                                                                           | alanine transaminase/an, bl or exp aspartate aminotransferases/an, bl                                                                                                                                                                                                                                                                 |
| 16                                                                                                                                                                                                           | Albumins/an or Albuminuria/bl, ur                                                                                                                                                                                                                                                                                                     |
| 17                                                                                                                                                                                                           | serum albumin/ or serum albumin, human/                                                                                                                                                                                                                                                                                               |
| 18                                                                                                                                                                                                           | exp Bilirubin/an, bl                                                                                                                                                                                                                                                                                                                  |
| 19                                                                                                                                                                                                           | alpha-Fetoproteins/an, bl                                                                                                                                                                                                                                                                                                             |
| 20                                                                                                                                                                                                           | Alkaline Phosphatase/an, bl [Analysis, Blood]                                                                                                                                                                                                                                                                                         |
| 21                                                                                                                                                                                                           | exp Kidney Function Tests/                                                                                                                                                                                                                                                                                                            |
| 22                                                                                                                                                                                                           | Sodium/an, bl, ur                                                                                                                                                                                                                                                                                                                     |
| 23                                                                                                                                                                                                           | Potassium/an, bl, ur                                                                                                                                                                                                                                                                                                                  |
| 24                                                                                                                                                                                                           | Creatinine/an, bl, ur                                                                                                                                                                                                                                                                                                                 |
| 25                                                                                                                                                                                                           | Urea/an, bl, ur                                                                                                                                                                                                                                                                                                                       |

|    |                                                                                                                                                                                                                                |
|----|--------------------------------------------------------------------------------------------------------------------------------------------------------------------------------------------------------------------------------|
| 26 | Amylases/an, bl                                                                                                                                                                                                                |
| 27 | Calcium/an, bl, ur                                                                                                                                                                                                             |
| 28 | Glycated Hemoglobin A/an, bl or Blood Glucose/an, bl                                                                                                                                                                           |
| 29 | Blood Proteins/an, bl                                                                                                                                                                                                          |
| 30 | C-Reactive Protein/an, bl                                                                                                                                                                                                      |
| 31 | exp Thyrotropin/an, bl                                                                                                                                                                                                         |
| 32 | ((hemoglobin? or haemoglobin? or hb) adj3 (variation? or level? or concentration? or declin* or mean cell)).ti,ab,kf. or (hemoglobin? or haemoglobin?).ti.                                                                     |
| 33 | ((complete blood or whole blood or blood cell or white cell or erythrocyte? or leukocyte? or platelet? or lymphocyte? or eosinophil? or neutrophil? or basophil? or monocyte?) adj2 (count? or variation?)).ti,ab,kf.          |
| 34 | ((lymphocyte? or eosinophil? or neutrophil? or basophil? or monocyte?) adj2 (percent* or "%")).ti,ab,kf.                                                                                                                       |
| 35 | (erythrocyte sedimentation or blood sedimentation or blood viscosity or mean platelet or mean cell volume or hematocrit? or haematocrit? or ((blood cell or erythrocyte?) adj2 (index or indices or distribution))).ti,ab,kf.  |
| 36 | ((c-reactive protein or crp) adj3 (plasma or serum or blood or variation? or level? or concentration? or elevat? or increas* or high*)).ti,ab,kf. or (c-reactive protein or crp).ti.                                           |
| 37 | ((total or serum or blood or plasma) adj2 protein?).ti,ab,kf. or protein.ti.                                                                                                                                                   |
| 38 | ((albumin? adj3 (plasma or serum or blood or variation? or level? or concentration? or declin*)) or albumin creatinine ratio?).ti,ab,kf. or albumin*.ti.                                                                       |
| 39 | ((alkaline phosphatase or alp) adj3 (plasma or serum or blood or variation? or level? or concentration? or elevat? or increas* or high*)).ti,ab,kf. or (alkaline phosphatase or alp).ti.                                       |
| 40 | ((aminotransferase or ast or sgot or alt or sgpt) adj3 (plasma or serum or blood or variation? or level? or concentration? or elevat? or increas* or high*)).ti,ab,kf. or (aminotransferase or ast or sgot or alt or sgpt).ti. |
| 41 | (bilirubin adj3 (plasma or serum or blood or variation? or level? or concentration? or elevat? or increas* or high*)).ti,ab,kf. or bilirubin.ti.                                                                               |
| 42 | (liver enzyme? adj3 (plasma or serum or blood or variation? or level? or concentration? or elevat? or increas* or high*)).ti,ab,kf. or (liver enzyme? or liver function).ti. or liver function test*.ti,ab,kf.                 |
| 43 | (renal funtion test* or kidney function test*).ti,ab,kf. or (renal function or kidney function).ti.                                                                                                                            |

|    |                                                                                                                                                                                                                                                                                                                                                                                     |
|----|-------------------------------------------------------------------------------------------------------------------------------------------------------------------------------------------------------------------------------------------------------------------------------------------------------------------------------------------------------------------------------------|
| 44 | (sodium adj3 (plasma or serum or blood or variation? or level? or concentration? or declin*)).ti,ab,kf. or sodium.ti.                                                                                                                                                                                                                                                               |
| 45 | (potassium adj3 (plasma or serum or blood or variation? or level? or concentration? or elevat? or increas* or high*)).ti,ab,kf. or potassium.ti.                                                                                                                                                                                                                                    |
| 46 | (creatinine adj3 (plasma or serum or blood or variation? or level? or concentration? or elevat? or increas* or high*)).ti,ab,kf. or creatinine.ti.                                                                                                                                                                                                                                  |
| 47 | ((urea adj3 (plasma or serum or blood or variation? or level? or concentration? or decline?)) or urea cycle?).ti,ab,kf. or urea.ti.                                                                                                                                                                                                                                                 |
| 48 | (amylase adj3 (plasma or serum or blood or variation? or level? or concentration? or elevat? or increas* or high*)).ti,ab,kf. or amylase.ti.                                                                                                                                                                                                                                        |
| 49 | ((glucose or hba1c) adj3 (plasma or serum or blood or variation? or level? or concentration? or elevat? or increas* or high*)) or fasting glucose).ti,ab,kf. or (glucose or hba1c).ti.                                                                                                                                                                                              |
| 50 | (calcium adj3 (plasma or serum or blood or variation? or level? or concentration? or elevat? or increas* or high*)).ti,ab,kf. or calcium.ti. or calcium adjusted.ti,ab,kf.                                                                                                                                                                                                          |
| 51 | ((thyrotropin? or thyroid stimulating hormone?) adj3 (plasma or serum or blood or variation? or level? or concentration? or elevat? or increas* or high*)) or fasting glucose).ti,ab,kf. or (thyrotropon? or thyroid stimulating hormone?).ti.                                                                                                                                      |
| 52 | anemia/ or anemia, hypochromic/ or anemia, iron-deficiency/ or exp anemia, macrocytic/                                                                                                                                                                                                                                                                                              |
| 53 | (an?emia? or an?emic or microcytosis or microcytic).ti,ab,kf.                                                                                                                                                                                                                                                                                                                       |
| 54 | or/5-53                                                                                                                                                                                                                                                                                                                                                                             |
| 55 | 4 and 54                                                                                                                                                                                                                                                                                                                                                                            |
| 56 | 1 or 55                                                                                                                                                                                                                                                                                                                                                                             |
| 57 | exp Neoplasms/di                                                                                                                                                                                                                                                                                                                                                                    |
| 58 | early diagnosis/ or "early detection of cancer"/                                                                                                                                                                                                                                                                                                                                    |
| 59 | (detect* or diagnos* or screen*).ti.                                                                                                                                                                                                                                                                                                                                                |
| 60 | ((neoplas* or tumor* or tumour* or cancer* or malignan* or carcino* or sarcom* or leukaem* or leukem* or lymphom* or melano* or metasta* or mesothelio* or mesotelio* or carcinomatos* or gliom* or glioblastom* or osteosarcom* or blastom* or neuroblastom* or oncolog* or myelodysplas* or adenocarcinoma* or choriocarcinoma*) adj3 (diagnos* or detect* or screen*)).ti,ab,kf. |
| 61 | 57 or 58 or 59 or 60                                                                                                                                                                                                                                                                                                                                                                |
| 62 | 56 and 61                                                                                                                                                                                                                                                                                                                                                                           |

63 (trend? or pattern? or lead time\* or timeline\* or time line\* or time frame? or time frame? or interval?).ti,ab,kf.

64 ((longterm or long-term) adj2 (variation? or chang\* or difference\* or declin\* or decreas\* or increas\* or elevat\* or level? or concentration)).ti,ab,kf.

65 (prediagnos\* or pre-diagnos\* or ((before or prior) adj2 diagnos\*)).ti,ab,kf.

66 ((risk? or predict\*) adj5 (model\* or logarithm\* or algorithm\* or maching learning)).ti,ab,kf.

67 (model\* or logarithm\* or algorithm\* or maching learning).ti.

68 (risk? adj2 (scor\* or model\* or index or indices or tool\* or assessment? or measurement?)).ti,ab,kf.

69 (Models, Biological/ or Models, Statistical/) and exp Risk/

70 63 or 64 or 65 or 66 or 67 or 68 or 69

71 62 and 70

72 exp animals/ not humans/

73 71 not 72

**Table S2: Final search strategy (EMBASE)**

| EMBASE                                                                                 |                                                                                                                                                                                                                                                                                                                                       |
|----------------------------------------------------------------------------------------|---------------------------------------------------------------------------------------------------------------------------------------------------------------------------------------------------------------------------------------------------------------------------------------------------------------------------------------|
| Database and platform: Embase 1974 to present. Search date: 15 <sup>th</sup> May 2023. |                                                                                                                                                                                                                                                                                                                                       |
| 1                                                                                      | exp *neoplasm/                                                                                                                                                                                                                                                                                                                        |
| 2                                                                                      | (neoplas* or tumor* or tumour* or cancer* or malignan* or carcino* or sarcom* or leukaem* or leukem* or lymphom* or melano* or metasta* or mesothelio* or mesotelio* or carcinomatos* or gliom* or glioblastom* or osteosarcom* or blastom* or neuroblastom* or oncolog* or myelodysplas* or adenocarcinoma* or choriocarcinoma*).ti. |
| 3                                                                                      | 1 or 2                                                                                                                                                                                                                                                                                                                                |
| 4                                                                                      | hematological parameters/                                                                                                                                                                                                                                                                                                             |
| 5                                                                                      | exp blood cell count/                                                                                                                                                                                                                                                                                                                 |
| 6                                                                                      | exp blood cell/an                                                                                                                                                                                                                                                                                                                     |
| 7                                                                                      | erythrocyte sedimentation rate/                                                                                                                                                                                                                                                                                                       |
| 8                                                                                      | Blood Viscosity/                                                                                                                                                                                                                                                                                                                      |
| 9                                                                                      | exp hemoglobin/an                                                                                                                                                                                                                                                                                                                     |
| 10                                                                                     | hemoglobin blood level/ or "hemoglobin determination"/                                                                                                                                                                                                                                                                                |
| 11                                                                                     | Hematocrit/                                                                                                                                                                                                                                                                                                                           |
| 12                                                                                     | exp erythrocyte parameters/                                                                                                                                                                                                                                                                                                           |
| 13                                                                                     | blood clotting parameters/ or exp platelet volume/                                                                                                                                                                                                                                                                                    |
| 14                                                                                     | exp liver function test/                                                                                                                                                                                                                                                                                                              |
| 15                                                                                     | enzyme blood level/                                                                                                                                                                                                                                                                                                                   |
| 16                                                                                     | alanine aminotransferase blood level/ or aminotransferase blood level/ or aspartate aminotransferase blood level/                                                                                                                                                                                                                     |
| 17                                                                                     | protein blood level/                                                                                                                                                                                                                                                                                                                  |
| 18                                                                                     | albumin blood level/                                                                                                                                                                                                                                                                                                                  |
| 19                                                                                     | bilirubin blood level/                                                                                                                                                                                                                                                                                                                |
| 20                                                                                     | alpha fetoprotein blood level/                                                                                                                                                                                                                                                                                                        |
| 21                                                                                     | alkaline phosphatase blood level/                                                                                                                                                                                                                                                                                                     |
| 22                                                                                     | exp kidney function test/ or electrolyte blood level/                                                                                                                                                                                                                                                                                 |
| 23                                                                                     | sodium blood level/                                                                                                                                                                                                                                                                                                                   |
| 24                                                                                     | potassium blood level/                                                                                                                                                                                                                                                                                                                |
| 25                                                                                     | creatine kinase blood level/ or creatinine blood level/                                                                                                                                                                                                                                                                               |
| 26                                                                                     | urea blood level/                                                                                                                                                                                                                                                                                                                     |

- 27 amylase blood level/
- 28 calcium blood level/
- 29 glucose blood level/ or exp \*hemoglobin A1c/
- 30 C reactive protein/an
- 31 exp thyroid hormone blood level/ or thyrotropin blood level/
- 32 ((hemoglobin? or haemoglobin? or hb) adj3 (variation? or level? or concentration? or declin\* or mean cell)).ti,ab,kf. or (hemoglobin? or haemoglobin?).ti.
- 33 ((complete blood or whole blood or blood cell or white cell or erythrocyte? or leukocyte? or platelet? or lymphocyte? or eosinophil? or neutrophil? or basophil? or monocyte?) adj2 (count? or variation?)).ti,ab,kf.
- 34 ((lymphocyte? or eosinophil? or neutrophil? or basophil? or monocyte?) adj2 (percent\* or "%")).ti,ab,kf.
- 35 (erythrocyte sedimentation or blood sedimentation or blood viscosity or mean platelet or mean cell volume or hematocrit? or haematocrit? or ((blood cell or erythrocyte?) adj2 (index or indices or distribution))).ti,ab,kf.
- 36 ((c-reactive protein or crp) adj3 (plasma or serum or blood or variation? or level? or concentration? or elevat? or increas\* or high\*)).ti,ab,kf. or (c-reactive protein or crp).ti.
- 37 ((total or serum or blood or plasma) adj2 protein?).ti,ab,kf. or protein.ti.
- 38 ((albumin? adj3 (plasma or serum or blood or variation? or level? or concentration? or declin\*)) or albumin creatinine ratio?).ti,ab,kf. or albumin\*.ti.
- 39 ((alkaline phosphatase or alp) adj3 (plasma or serum or blood or variation? or level? or concentration? or elevat? or increas\* or high\*)).ti,ab,kf. or (alkaline phosphatase or alp).ti.
- 40 ((aminotransferase or ast or sgot or alt or sgpt) adj3 (plasma or serum or blood or variation? or level? or concentration? or elevat? or increas\* or high\*)).ti,ab,kf. or (aminotransferase or ast or sgot or alt or sgpt).ti.
- 41 (bilirubin adj3 (plasma or serum or blood or variation? or level? or concentration? or elevat? or increas\* or high\*)).ti,ab,kf. or bilirubin.ti.
- 42 (liver enzyme? adj3 (plasma or serum or blood or variation? or level? or concentration? or elevat? or increas\* or high\*)).ti,ab,kf. or (liver enzyme? or liver function).ti. or liver function test\*.ti,ab,kf.
- 43 (renal funtion test\* or kidney function test\*).ti,ab,kf. or (renal function or kidney function).ti.
- 44 (sodium adj3 (plasma or serum or blood or variation? or level? or concentration? or declin\*)).ti,ab,kf. or sodium.ti.

- 45 (potassium adj3 (plasma or serum or blood or variation? or level? or concentration? or elevat? or increas\* or high\*)).ti,ab,kf. or potassium.ti.
- 46 (creatinine adj3 (plasma or serum or blood or variation? or level? or concentration? or elevat? or increas\* or high\*)).ti,ab,kf. or creatinine.ti.
- 47 ((urea adj3 (plasma or serum or blood or variation? or level? or concentration? or decline?)) or urea cycle?).ti,ab,kf. or urea.ti.
- 48 (amylase adj3 (plasma or serum or blood or variation? or level? or concentration? or elevat? or increas\* or high\*)).ti,ab,kf. or amylase.ti.
- 49 (((glucose or hba1c) adj3 (plasma or serum or blood or variation? or level? or concentration? or elevat? or increas\* or high\*)) or fasting glucose).ti,ab,kf. or (glucose or hba1c).ti.
- 50 (calcium adj3 (plasma or serum or blood or variation? or level? or concentration? or elevat? or increas\* or high\*)).ti,ab,kf. or calcium.ti. or calcium adjusted.ti,ab,kf.
- 51 (((thyrotropin? or thyroid stimulating hormone?) adj3 (plasma or serum or blood or variation? or level? or concentration? or elevat? or increas\* or high\*)) or fasting glucose).ti,ab,kf. or (thyrotropon? or thyroid stimulating hormone?).ti.
- 52 anemia/ or exp iron deficiency anemia/ or exp macrocytic anemia/
- 53 (an?emia? or an?emic or microcytosis or microcytic).ti,ab,kf.
- 54 or/4-53
- 55 exp Neoplasm/di
- 56 early diagnosis/ or cancer diagnosis/ or early cancer diagnosis/
- 57 (detect\* or diagnos\* or screen\*).ti.
- 58 ((neoplas\* or tumor\* or tumour\* or cancer\* or malignan\* or carcino\* or sarcom\* or leukaem\* or leukem\* or lymphom\* or melano\* or metasta\* or mesothelio\* or mesotelio\* or carcinomatos\* or gliom\* or glioblastom\* or osteosarcom\* or blastom\* or neuroblastom\* or oncolog\* or myelodysplas\* or adenocarcinoma\* or choriocarcinoma\*) adj3 (diagnos\* or detect\* or screen\*)).ti,ab,kf.
- 59 55 or 56 or 57 or 58
- 60 (trend? or pattern? or lead time\* or timeline\* or time line\* or time frame? or time frame? or interval?).ti,ab,kf.
- 61 ((longterm or long-term) adj2 (variation? or chang\* or difference\* or declin\* or decreas\* or increas\* or elevat\* or level? or concentration)).ti,ab,kf.
- 62 (prediagnos\* or pre-diagnos\* or ((before or prior) adj2 diagnos\*)).ti,ab,kf.

|    |                                                                                                               |
|----|---------------------------------------------------------------------------------------------------------------|
| 63 | ((risk? or predict*) adj5 (model* or logarithm* or algorithm* or machining learning)).ti,ab,kf.               |
| 64 | (model* or logarithm* or algorithm* or machining learning).ti.                                                |
| 65 | (risk? adj2 (scor* or model* or index or indices or tool* or assessment? or measurement?)).ti,ab,kf.          |
| 66 | (statistical model/ or biological model/ or disease model/ or cancer model/) and (risk/ or *risk assessment/) |
| 67 | 60 or 61 or 62 or 63 or 64 or 65 or 66                                                                        |
| 68 | 3 and 54 and 59 and 67                                                                                        |
| 69 | exp animal/ not human/                                                                                        |
| 70 | 68 not 69                                                                                                     |
| 71 | conference*.pt.                                                                                               |
| 72 | 70 not 71                                                                                                     |
| 73 | 70 and 71                                                                                                     |



**Table S3: Detailed description of the 29 studies included in the review**

| Article         | Study type    | Study design | Geographic location | Patient setting | Reason for blood testing <sup>1</sup> | Patient population                                                                                                                                                                                                                                                                                                                                                                                                                                     | Average age <sup>2</sup> | % female | No. blood tests | No. cancers |
|-----------------|---------------|--------------|---------------------|-----------------|---------------------------------------|--------------------------------------------------------------------------------------------------------------------------------------------------------------------------------------------------------------------------------------------------------------------------------------------------------------------------------------------------------------------------------------------------------------------------------------------------------|--------------------------|----------|-----------------|-------------|
| Atkin 2020      | Retrospective | Case series  | UK                  | Secondary care  | Opportunistic tests                   | All patients diagnosed with multiple myeloma                                                                                                                                                                                                                                                                                                                                                                                                           |                          |          | 4               | 1           |
| Boursi 2016     | Retrospective | Case-control | UK                  | Primary care    | Opportunistic tests                   | All people receiving medical care from 1995 to 2013 from a THIN practitioner were eligible for inclusion. Subjects with a diagnosis of CRC syndromes, familial history of CRC, or IBD were excluded in order to focus on sporadic CRC. Patients without acceptable medical records were excluded (i.e., patients with incomplete documentation or out of sequence date of birth, registration date, date of death, or date of exit from the database). | 69.72                    | 52.7     | 8               | 1           |
| Chaturvedi 2010 | Retrospective | Case-control |                     | Other           | Screening for cancer                  | The PLCO study, a randomized trial aimed at evaluating the efficacy of screening in reducing cancer mortality, recruited approximately 155,000 men and women age 55 to 74 years from 1992 to 2001.                                                                                                                                                                                                                                                     | 65-69                    | 33.3     | 1               | 1           |
| Edgren 2010     | Retrospective | Case-control | Sweden and Denmark  | Other           | Opportunistic tests                   | We considered all donors for whom at least one successful whole blood, plasma or platelet donation was recorded between the January 1st, 1968 and December 31st, 2002, and who had no history of cancer at the time of the first recorded donation.                                                                                                                                                                                                    | 52.1                     | 47       | 1               | 12          |

|               |               |              |       |         |                      |                                                                                                                                                                                                                                                                                                                                                                                                                                                                                                                                                                                                                                                                                                                                                                                                                                                                                                             |    |      |   |   |
|---------------|---------------|--------------|-------|---------|----------------------|-------------------------------------------------------------------------------------------------------------------------------------------------------------------------------------------------------------------------------------------------------------------------------------------------------------------------------------------------------------------------------------------------------------------------------------------------------------------------------------------------------------------------------------------------------------------------------------------------------------------------------------------------------------------------------------------------------------------------------------------------------------------------------------------------------------------------------------------------------------------------------------------------------------|----|------|---|---|
| Feng 2020     | Retrospective | Cohort       | China | Unclear | Screening for cancer | Employees from the Kailuan Group older than 18 years including retired individuals from the Kailuan Group were invited to participate in health examinations. The current study was restricted to the population who participated in the examination in 2006 and at least one examination in 2008 and 2010. There were 101,139 individuals free from cancer who participated in the examination from 2006 to 2007. We excluded 1,222 participants without 2006 FBG data, 15,710 participants without FBG data or date of examination at 2008 and 2010, 12,845 participants with diabetes during 2006–2010 (self-reported history of diabetes, currently treated with insulin or oral hypoglycemic agents or a FBG concentration $\geq 7.0$ mmol/l) and 1,620 participants who were either diagnosed with an incident cancer or died during the 2006–2010 period in which trajectories of FBG were assessed. | 50 | 21.2 | 1 | 2 |
| Fuente 2019   | Retrospective | Case-control | USA   | Other   | Opportunistic tests  | Only those who had either biopsy-proven PDAC or a pancreatic mass suspicious for adenocarcinoma with elevated CA19-9 or obstructive jaundice were included in the study as cases. For each confirmed PDAC case, we randomly selected 2 disease free age- (same birth year) and gender-matched Olmsted County residents as controls who were seen at the Mayo Clinic in the same calendar month as the matched cases date of PDAC diagnosis (index date).                                                                                                                                                                                                                                                                                                                                                                                                                                                    |    | 49   | 1 | 1 |
| Furukawa 1984 | Unclear       | Cohort       | Japan | Unclear | Screening for cancer | 114 patients with liver cirrhosis confirmed by laparoscopy and liver biopsy. None of them were treated with steroids.                                                                                                                                                                                                                                                                                                                                                                                                                                                                                                                                                                                                                                                                                                                                                                                       |    |      | 1 | 1 |

|                 |               |              |         |                |                     |                                                                                                                                                                                                                                                                                                                                                                                      |      |      |   |   |
|-----------------|---------------|--------------|---------|----------------|---------------------|--------------------------------------------------------------------------------------------------------------------------------------------------------------------------------------------------------------------------------------------------------------------------------------------------------------------------------------------------------------------------------------|------|------|---|---|
| Giannakeas 2022 | Retrospective | Case series  | Canada  | Primary care   | Opportunistic tests | Study subjects were patients with at least one complete blood count (CBC) record in the two-year period preceding or following a cancer diagnosis of the colon, lung, breast, prostate, stomach, or ovary.                                                                                                                                                                           |      |      | 1 | 6 |
| Goldshtein 2010 | Retrospective | Case-control | Israel  | Primary care   | Opportunistic tests | The study population included all MHS members aged 45–75 years who have been diagnosed with CRC between 1/1/2004 and 14/1/2009. We have excluded members whose Hb values were below normal ranges (11.7 g/dl for women and 12.6 g/dl for men) at any point during the first year of follow-up.                                                                                       |      |      | 1 | 1 |
| Gradel 2020     | Retrospective | Case series  | Denmark | Secondary care | Opportunistic tests | All patients with AML who were followed at the Department of Haematology, Odense University Hospital (OUH)                                                                                                                                                                                                                                                                           | 69.4 | 45.6 | 2 | 1 |
| Hauser 2021     | Retrospective | Cohort       | USA     | Primary care   | Opportunistic tests | Patients with a BCR-ABL1 test during the study period. Patients prescribed a tyrosine kinase receptor inhibitor (eg, imatinib, dasatinib, nilotinib, bosutinib) at any time prior to their first BCR-ABL1 test were excluded. The patients in the study population were required to have at least 6 consecutive years of differential blood cell counts preceding the BCR-ABL1 test. | 69   | 8    | 1 | 1 |
| Hsieh 2019      | Retrospective | Cohort       | USA     | Secondary care | Opportunistic tests | Adult patients (aged 18 years) seen at Mayo Clinic, Rochester, Minnesota, from January 1, 2011, through December 31, 2016. Patients who had at least 2 readings of platelet counts greater than 1000 109/L within 30 days of each other were identified.                                                                                                                             | 57   |      | 1 | 1 |

|               |               |              |        |              |                                           |                                                                                                                                                                                                                                                                                                                                                                                                                                                                                                                                                                                                                                                                                                                                                                                                                |      |      |   |   |
|---------------|---------------|--------------|--------|--------------|-------------------------------------------|----------------------------------------------------------------------------------------------------------------------------------------------------------------------------------------------------------------------------------------------------------------------------------------------------------------------------------------------------------------------------------------------------------------------------------------------------------------------------------------------------------------------------------------------------------------------------------------------------------------------------------------------------------------------------------------------------------------------------------------------------------------------------------------------------------------|------|------|---|---|
|               |               |              |        |              |                                           | Patients who declined bone marrow studies despite physicians' recommendations were excluded (n%3).                                                                                                                                                                                                                                                                                                                                                                                                                                                                                                                                                                                                                                                                                                             |      |      |   |   |
| Huang 2020    | Retrospective | Cohort       | USA    | Unclear      | Opportunistic tests                       | Patients were eligible for the study if they met the following inclusion criteria during 2006–2016: 45–90 years of age, 2 years of continuous membership, and available information for body mass index (BMI), smoking, and alcohol use. The 2-year membership requirement was used to ensure that individuals were in the KPSC system long enough to establish an accurate medical history. Otherwise eligible patients were further excluded if they did not have a glucose (fasting, random, or oral glucose tolerance) or HbA1c measurement (n ¼ 67,486), were not in the 4 major race or ethnicity groups (Asian, non-Hispanic black, Hispanic, non-Hispanic white) (n ¼ 80,801), or had a prior diagnosis of pancreatic cancer (n ¼ 523). Trends were assessed in the subgroup of diabetic patients only | 57.9 | 55.2 | 2 | 1 |
| Iversen 1996  | Retrospective | Case-control | Norway | Unclear      | Opportunistic tests                       | All cancer cases in Norway are reported to the Norwegian Cancer Registry. 500 RCC patients were selected. 130 were excluded as they had no pre-diagnostic ESR records. The results were compared to control data                                                                                                                                                                                                                                                                                                                                                                                                                                                                                                                                                                                               |      | 44.7 | 1 | 1 |
| Jacobson 2021 | Prospective   | Case-control | Sweden | Primary care | Screening for cancer (+ other conditions) | The NSHDS is a cohort study where the general population is invited to health examinations. We identified NSHDS participants that were subsequently diagnosed with pancreatic cancer in the                                                                                                                                                                                                                                                                                                                                                                                                                                                                                                                                                                                                                    | 64.2 | 39   | 1 | 1 |

|                 |               |              |        |              |                                           |                                                                                                                                                                                                                                                                                                                                                                                                                                    |      |      |   |   |
|-----------------|---------------|--------------|--------|--------------|-------------------------------------------|------------------------------------------------------------------------------------------------------------------------------------------------------------------------------------------------------------------------------------------------------------------------------------------------------------------------------------------------------------------------------------------------------------------------------------|------|------|---|---|
|                 |               |              |        |              |                                           | Swedish cancer registry between January 1990 and December 2016. We used medical records to include only individuals with pancreatic ductal adenocarcinoma verified by histology or cytology. We excluded individuals with an uncertain diagnosis and those without records of fasting glucose, oral glucose tolerance tests (OGTT) or diabetes status. Controls without any cancer diagnosis were selected from the NSHDS.         |      |      |   |   |
| Jonsson 2020    | Prospective   | Case-control | Sweden | Primary care | Screening for cancer (+ other conditions) | Plasma samples were obtained from the Northern Sweden Health and Disease Study (NSHDS). Incident cases were diagnosed with glioma after the sampling. We identified 132 individuals diagnosed with glioma. We also randomly selected 132 controls (cancer-free at inclusion) with single or repeated samples. None of the cases had prior history of cancer.                                                                       |      | 78.1 | 2 | 1 |
| Koshiraris 2018 | Retrospective | Case-control | UK     | Primary care | Opportunistic tests                       | Cases were selected if patients were >40 years of age with a myeloma diagnosis between January 2000 and December 2009. Date of diagnosis was defined as the first myeloma Read code, which was also used as the index date for the controls. Exclusion criteria included cases or controls with <1 year of records, cases without controls, controls with myeloma, and controls that did not seek medical care after registration. | 73   | 47   | 7 | 1 |
| Kubo 2016       | Retrospective | Case series  | Japan  | Other        | Screening for cancer                      | Nine patients with occupational cholangiocarcinoma (Table 1). Of the nine patients, six worked at a single printing company in Osaka                                                                                                                                                                                                                                                                                               | 36.4 | 0    | 2 | 1 |

|               |               |              |        |                |                     |                                                                                                                                                                                                                                                                                                                                                                                |       |      |   |   |
|---------------|---------------|--------------|--------|----------------|---------------------|--------------------------------------------------------------------------------------------------------------------------------------------------------------------------------------------------------------------------------------------------------------------------------------------------------------------------------------------------------------------------------|-------|------|---|---|
|               |               |              |        |                |                     | (Company A) [2], two worked at another company (Company B), and one worked at third company (Company C) [4]. Of the nine patients, seven patients (patients 1, 3–8) were exposed to a high concentration of DCP, one (patient 9) was exposed to a high concentration of DCM and one (patient 2) was exposed to high concentrations of both DCP and DCM.                        |       |      |   |   |
| Lemanska 2022 | Retrospective | Case-control | UK     | Primary care   | Opportunistic tests | Practice inclusion was limited to practices passing data quality control. Participants were included in the matching process if they either had a pancreatic cancer diagnosis, or any of the listed above pancreatic cancer features at the age of 40+ years. The study sample included 3,539,397 adults registered within 590 practices.                                      | 72.1  | 49.8 | 1 | 1 |
| Li 2021       | Retrospective | Case-control | Sweden | Primary care   | Opportunistic tests | All patients who had at least one hemoglobin test requested in primary care during 2000–2017, Aug 22 and who were above the age of 40 at the time of testing were identified. Colorectal cancer patients who have had no hemoglobin test in primary care prior to diagnosis, or only had post-CRC diagnostic hemoglobin tests in primary care were not eligible for the study. | 70-79 | 49.4 | 1 | 1 |
| Pannala 2009  | Retrospective | Case-control | USA    | Secondary care | Opportunistic tests | All outpatient FBG values in the Mayo records for 60 months before the index date for 1,172 cases and 2,344 controls. Of these individuals, the 736 cases and 1,875 controls who had at least one outpatient FBG value in the preceding 60 months or within one month following the index date (provided they received no                                                      | 68.7  | 46.5 | 1 | 1 |

|                 |               |              |        |              |                     |                                                                                                                                                                                                                                                                                                                                                                                                                                                                                                                                                                                                                                                                                                                                                                 |    |    |   |   |
|-----------------|---------------|--------------|--------|--------------|---------------------|-----------------------------------------------------------------------------------------------------------------------------------------------------------------------------------------------------------------------------------------------------------------------------------------------------------------------------------------------------------------------------------------------------------------------------------------------------------------------------------------------------------------------------------------------------------------------------------------------------------------------------------------------------------------------------------------------------------------------------------------------------------------|----|----|---|---|
|                 |               |              |        |              |                     | treatment for pancreatic cancer) constituted the study population; further analyses were restricted to this subset of cases and controls.                                                                                                                                                                                                                                                                                                                                                                                                                                                                                                                                                                                                                       |    |    |   |   |
| Rinaldi 2014    | Prospective   | Case-control | Europe | Primary care | Opportunistic tests | The EPIC cohort consists of approximately 370 000 women and 150 000 men apparently healthy and aged 35 to 69 years when recruited between 1992 and 1998 in 23 centers in 10 European countries. Participants were excluded if they reported a history of cancer other than nonmelanoma skin cancer. Thyroid cancer case patients with rare histological types (28 medullary, 6 anaplastic, and 3 other morphologies, and 1 lymphoma) were not included.                                                                                                                                                                                                                                                                                                         |    | 80 | 1 | 1 |
| Sadr-Azodi 2015 | Retrospective | Case-control | Sweden | Unclear      | Opportunistic tests | All patients with diabetes mellitus in Sweden with a record in the Swedish National Diabetes Register (NDR) [14] and who had a dispensed prescription of anti-diabetic drugs. Individuals with missing information on the first recorded HbA 1c in the NDR (n=18 530), type of diabetes mellitus (n=23 280), duration of diabetes mellitus (n=35 248) and type of anti-diabetic treatment (n=3086) were excluded from the source population. In addition, patients with secondary diabetes mellitus (n=1515) and patients with a history of cancer diagnosis (excluding non-melanoma cancer of the skin) or cancer diagnosis (including neuroendocrine tumors of the pancreas) apart from pancreatic cancer during the follow-up (n=35 554) were also excluded. | 67 | 44 | 1 | 1 |

|              |               |              |         |              |                      |                                                                                                                                                                                                                                                                                                                                                                                                                                                                                                                           |       |      |   |   |
|--------------|---------------|--------------|---------|--------------|----------------------|---------------------------------------------------------------------------------------------------------------------------------------------------------------------------------------------------------------------------------------------------------------------------------------------------------------------------------------------------------------------------------------------------------------------------------------------------------------------------------------------------------------------------|-------|------|---|---|
| Sharma 2018  | Retrospective | Case-control | USA     | Unclear      | Opportunistic tests  | All PDAC subjects in Olmsted County between 2000 and 2015, and manually reviewed their medical charts to include only those with a definite (confirmed by histopathology) or probable diagnosis of PDAC (pancreatic mass with elevated CA19-9 or obstructive jaundice). For each patient with PDAC we selected 2 age- (same birth year) and gender-matched Olmsted County residents as controls who were seen at the Mayo Clinic in the same calendar month as the matched patient's date of PDAC diagnosis (index date). | 71.6  | 49   | 1 | 1 |
| Stroud 2020  | Prospective   | Cohort       | USA     | Unclear      | Screening for cancer | Participants aged 18+ years who underwent a primary bariatric surgery. All patients had no history of cancer, no cancer within 12 months post-operation, and at least 1 follow-up visit. Patients diagnosed without a diagnosis date or patients withdrawn between their 12-month post-operative and next scheduled visit were excluded                                                                                                                                                                                   | 46    | 79.1 | 1 | 1 |
| Tan 2023     | Retrospective | Case-control | UK      | Primary care | Opportunistic tests  | Adult patients aged 18 years and above were eligible for inclusion and entered the study                                                                                                                                                                                                                                                                                                                                                                                                                                  | 72.08 | 50.3 | 7 | 1 |
| Toriola 2011 | Retrospective | Case-control | Finland | Other        | Opportunistic tests  | First trimester blood samples are withdrawn from pregnant women at the municipal maternity care units. ovarian cancer cases who had been pregnant on at least two occasions before cancer diagnosis and who had donated serum samples to the FMC during these different pregnancies were identified. Eligible                                                                                                                                                                                                             |       | 100  | 1 | 1 |



|              |               |              |     |              |                     |                                                                                                                                                                                                                                                                                                                                                                                                                                                                     |       |      |    |   |
|--------------|---------------|--------------|-----|--------------|---------------------|---------------------------------------------------------------------------------------------------------------------------------------------------------------------------------------------------------------------------------------------------------------------------------------------------------------------------------------------------------------------------------------------------------------------------------------------------------------------|-------|------|----|---|
|              |               |              |     |              |                     | controls were women from the FMC who were alive and free of cancer at the time of diagnosis of the case and had also donated at least two serum samples during different pregnancies.                                                                                                                                                                                                                                                                               |       |      |    |   |
| Toriola 2013 | Retrospective | Case-control | USA | Other        | Opportunistic tests | Women were eligible for the WHI-OS if they were postmenopausal, 50–79 years old and unlikely to relocate or die within 3 years.                                                                                                                                                                                                                                                                                                                                     |       | 100  | 1  | 1 |
| Virdee 2022  | Retrospective | Case-control | UK  | Primary care | Opportunistic tests | Age 40+ years with at least one FBC blood test within 10 years before index date. Patients registered <1 year with their primary care practice, history of colorectal cancer before study entry, or diagnosed after study exit were excluded. Patients diagnosed with another cancer type before or simultaneously with colorectal cancer diagnosis were excluded. Patients with an available date of diagnosis but no indication of the cancer type were excluded. | 60.32 | 57.5 | 14 | 1 |

<sup>1</sup>Opportunistic tests are those performed for various reasons but are being utilised for cancer assessment.

<sup>2</sup>Case-control studies: mean age at index date (diagnosis for cases, censor for controls). Other studies: mean age at study entry.

**Table S4: Full blood count trends analysed per study**

| Article         | RBC | Hb | Hc | MCV | MCH | MCHC | RDW | Plat | MPV | WBC | BasC | BasP | EosC | EosP | LymC | LymP | MonC | MonP | NeutC | NeutP |
|-----------------|-----|----|----|-----|-----|------|-----|------|-----|-----|------|------|------|------|------|------|------|------|-------|-------|
| Atkin 2020      |     | X  | X  |     |     |      |     |      |     |     |      |      |      |      |      |      |      |      |       |       |
| Boursi 2016     | X   |    | X  | X   | X   |      |     |      |     | X   |      |      |      |      |      |      |      |      |       |       |
| Chaturvedi 2010 |     |    |    |     |     |      |     |      |     |     |      |      |      |      |      |      |      |      |       |       |
| Edgren 2010     |     | X  |    |     |     |      |     |      |     |     |      |      |      |      |      |      |      |      |       |       |
| Feng 2020       |     |    |    |     |     |      |     |      |     |     |      |      |      |      |      |      |      |      |       |       |
| Fuente 2019     |     |    |    |     |     |      |     |      |     |     |      |      |      |      |      |      | X    |      |       |       |
| Furukawa 1984   |     |    |    |     |     |      |     |      |     |     |      |      |      |      |      |      |      |      |       |       |
| Giannakeas 2022 |     |    |    |     |     |      |     | X    |     |     |      |      |      |      |      |      |      |      |       |       |
| Goldshtein 2010 |     | X  |    |     |     |      |     |      |     |     |      |      |      |      |      |      |      |      |       |       |
| Gradel 2020     |     |    |    |     |     |      |     |      |     |     |      |      |      |      |      |      |      |      |       |       |
| Hauser 2021     |     |    |    |     |     |      |     |      |     |     |      | X    |      |      |      |      |      |      |       |       |
| Hsieh 2019      |     |    |    |     |     |      |     | X    |     |     |      |      |      |      |      |      |      |      |       |       |
| Huang 2020      |     |    |    |     |     |      |     |      |     |     |      |      |      |      |      |      |      |      |       |       |
| Iversen 1996    |     |    |    |     |     |      |     |      |     |     |      |      |      |      |      |      |      |      |       |       |
| Jacobson 2021   |     |    |    |     |     |      |     |      |     |     |      |      |      |      |      |      |      |      |       |       |
| Jonsson 2020    |     |    |    |     |     |      |     |      |     |     |      |      |      |      |      |      |      |      |       |       |
| Koshiaris 2018  |     | X  |    | X   |     |      |     |      |     |     |      |      |      |      |      |      |      |      |       |       |
| Kubo 2016       |     |    |    |     |     |      |     |      |     |     |      |      |      |      |      |      |      |      |       |       |
| Lemanska 2022   |     |    |    |     |     |      |     |      |     |     |      |      |      |      |      |      |      |      |       |       |
| Li 2021         |     | X  |    |     |     |      |     |      |     |     |      |      |      |      |      |      |      |      |       |       |
| Pannala 2009    |     |    |    |     |     |      |     |      |     |     |      |      |      |      |      |      |      |      |       |       |
| Rinaldi 2014    |     |    |    |     |     |      |     |      |     |     |      |      |      |      |      |      |      |      |       |       |
| Sadr-Azodi 2015 |     |    |    |     |     |      |     |      |     |     |      |      |      |      |      |      |      |      |       |       |
| Sharma 2018     |     |    |    |     |     |      |     |      |     |     |      |      |      |      |      |      |      |      |       |       |
| Stroud 2020     |     |    |    |     |     |      |     |      |     |     |      |      |      |      |      |      |      |      |       |       |
| Tan 2023        |     | X  |    |     |     |      |     | X    |     | X   |      |      |      |      |      |      |      |      |       |       |
| Toriola 2011    |     |    |    |     |     |      |     |      |     |     |      |      |      |      |      |      |      |      |       |       |
| Toriola 2013    |     |    |    |     |     |      |     |      |     |     |      |      |      |      |      |      |      |      |       |       |

|             |   |   |   |   |   |   |  |   |   |   |   |  |   |  |   |  |   |  |   |  |
|-------------|---|---|---|---|---|---|--|---|---|---|---|--|---|--|---|--|---|--|---|--|
| Virdee 2022 | X | X | X | X | X | X |  | X | X | X | X |  | X |  | X |  | X |  | X |  |
|-------------|---|---|---|---|---|---|--|---|---|---|---|--|---|--|---|--|---|--|---|--|

Grey shaded columns indicate that the blood test was not assessed by any study.

Abbreviations: RBC=red blood cells, Hb=haemoglobin, Hc=haematocrit, MCV=mean corpuscular volume, MCH=mean corpuscular haemoglobin, MCHC=mean corpuscular haemoglobin concentration, RDW=red blood cell distribution width, Plat=platelet count, MPV=mean platelet volume, WBC=white blood cells, BasC=basophil count, BasP=basophil %, EosC=eosinophil count, EosP=eosinophil %, LymC=lymphocyte count, LymP=lymphocyte %, MonC=monocyte count, MonP=monocyte %, NeuC=neutrophil count, NeuP=neutrophil %

**Table S5: Liver function, renal, inflammatory, and other test trends analysed per study**

| Article         | Liver function test |     |     |     |      | Renal test |     |       |      | Inflammatory Markers |     |    | Other blood tests |      |      |          |    |    |    |     |
|-----------------|---------------------|-----|-----|-----|------|------------|-----|-------|------|----------------------|-----|----|-------------------|------|------|----------|----|----|----|-----|
|                 | ALT                 | Alb | AST | ALP | Bili | Sod        | Pot | Creat | Urea | CRP                  | ESR | PV | Amy               | HbGl | Calc | Calc adj | TP | BG | FG | TSH |
| Atkin 2020      |                     |     |     |     |      |            |     | X     |      |                      |     |    |                   |      |      | X        |    |    |    |     |
| Boursi 2016     |                     | X   |     |     |      |            |     |       |      |                      |     |    |                   |      | X    |          |    | X  |    |     |
| Chaturvedi 2010 |                     |     |     |     |      |            |     |       |      | X                    |     |    |                   |      |      |          |    |    |    |     |
| Edgren 2010     |                     |     |     |     |      |            |     |       |      |                      |     |    |                   |      |      |          |    |    |    |     |
| Feng 2020       |                     |     |     |     |      |            |     |       |      |                      |     |    |                   |      |      |          |    |    | X  |     |
| Fuente 2019     |                     |     |     |     |      |            |     |       |      |                      |     |    |                   |      |      |          |    |    |    |     |
| Furukawa 1984   |                     |     | X   |     |      |            |     |       |      |                      |     |    |                   |      |      |          |    |    |    |     |
| Giannakeas 2022 |                     |     |     |     |      |            |     |       |      |                      |     |    |                   |      |      |          |    |    |    |     |
| Goldshtein 2010 |                     |     |     |     |      |            |     |       |      |                      |     |    |                   |      |      |          |    |    |    |     |
| Gradel 2020     |                     | X   |     |     |      |            | X   |       |      | X                    |     |    |                   |      |      |          |    |    |    |     |
| Hauser 2021     |                     |     |     |     |      |            |     |       |      |                      |     |    |                   |      |      |          |    |    |    |     |
| Hsieh 2019      |                     |     |     |     |      |            |     |       |      |                      |     |    |                   |      |      |          |    |    |    |     |
| Huang 2020      |                     |     |     |     |      |            |     |       |      |                      |     |    |                   | X    |      |          |    |    | X  |     |
| Iversen 1996    |                     |     |     |     |      |            |     |       |      |                      | X   |    |                   |      |      |          |    |    |    |     |
| Jacobson 2021   |                     |     |     |     |      |            |     |       |      |                      |     |    |                   |      |      |          |    |    | X  |     |
| Jonsson 2020    |                     |     |     |     |      |            |     | X     | X    |                      |     |    |                   |      |      |          |    |    |    |     |
| Koshiaris 2018  |                     |     |     |     |      |            |     | X     |      | X                    | X   | X  |                   |      | X    |          |    |    |    |     |
| Kubo 2016       | X                   |     | X   |     |      |            |     |       |      |                      |     |    |                   |      |      |          |    |    |    |     |
| Lemanska 2022   |                     |     |     |     |      |            |     |       |      |                      |     |    |                   | X    |      |          |    |    |    |     |
| Li 2021         |                     |     |     |     |      |            |     |       |      |                      |     |    |                   |      |      |          |    |    |    |     |
| Pannala 2009    |                     |     |     |     |      |            |     |       |      |                      |     |    |                   |      |      |          |    |    | X  |     |
| Rinaldi 2014    |                     |     |     |     |      |            |     |       |      |                      |     |    |                   |      |      |          |    |    |    | X   |
| Sadr-Azodi 2015 |                     |     |     |     |      |            |     |       |      |                      |     |    |                   | X    |      |          |    |    |    |     |
| Sharma 2018     |                     |     |     |     |      |            |     |       |      |                      |     |    |                   |      |      |          |    |    | X  |     |
| Stroud 2020     |                     |     |     |     |      |            |     |       |      |                      |     |    |                   |      |      |          |    | X  |    |     |
| Tan 2023        | X                   |     | X   |     | X    |            |     |       |      |                      |     |    |                   | X    |      |          |    |    |    |     |

|              |  |  |  |  |  |  |  |  |  |   |  |  |  |  |  |  |  |  |  |  |
|--------------|--|--|--|--|--|--|--|--|--|---|--|--|--|--|--|--|--|--|--|--|
| Toriola 2011 |  |  |  |  |  |  |  |  |  | X |  |  |  |  |  |  |  |  |  |  |
| Toriola 2013 |  |  |  |  |  |  |  |  |  | X |  |  |  |  |  |  |  |  |  |  |
| Virdee 2022  |  |  |  |  |  |  |  |  |  |   |  |  |  |  |  |  |  |  |  |  |

Grey shaded columns indicate that the blood test was not assessed by any study.

Abbreviations: ALT=alanine aminotransaminase, Alb=albumin, AST=aspartate transaminase, Bili=bilirubin, Creat=creatinine, CRP=C-reactive protein, ESR=erythrocyte sedimentation rate, PV=plasma viscosity, Calc=calcium, Calc adj=calcium adjusted, BG=blood glucose, FG=fasting glucose, TSH= thyroid stimulating hormone

**Figure S1: Number of studies analysing each blood level**

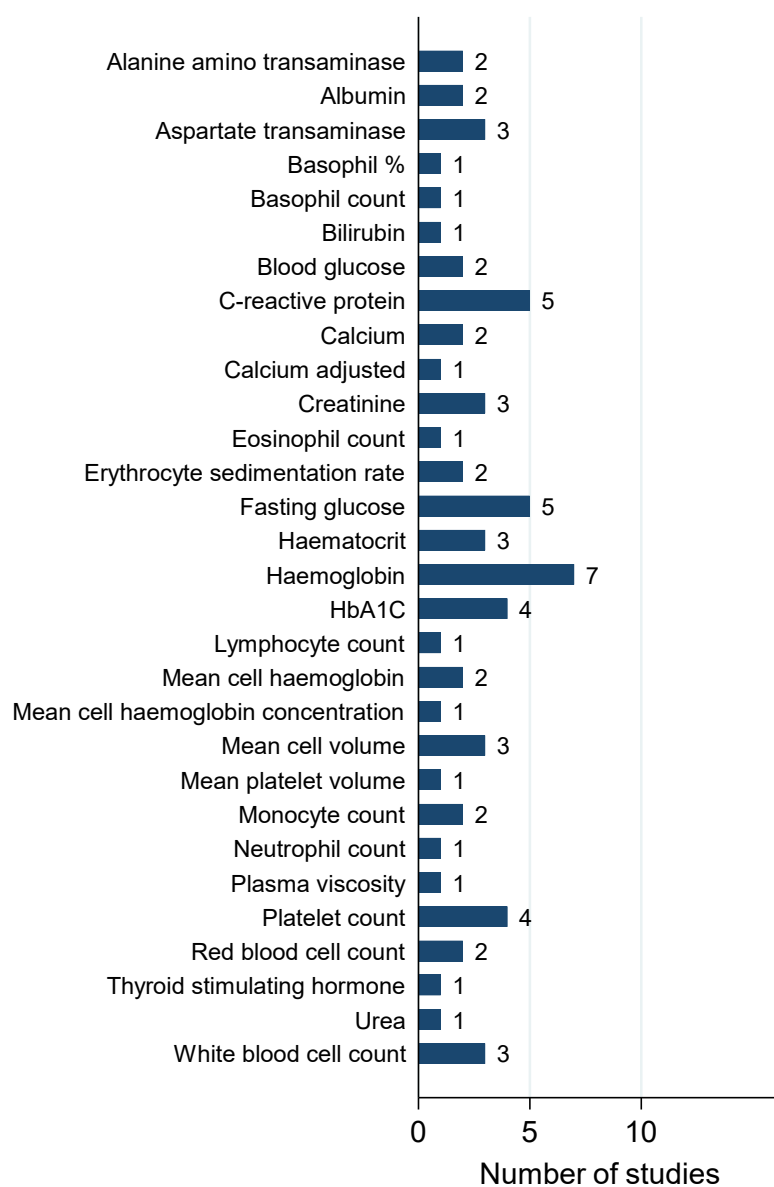

**Table S6: Blood test trends details and analytic approach per study**

| Article          | Analytic approach                                                       | Max longitudinal period for blood testing | Nature of repeat blood testing | If regularly taken, how often | Average no. blood tests used for trend | No. blood tests used in total |
|------------------|-------------------------------------------------------------------------|-------------------------------------------|--------------------------------|-------------------------------|----------------------------------------|-------------------------------|
| Atkin 2020       | One-way repeated measures ANOVA                                         | 13 years                                  | Sporadic                       |                               |                                        | 56711                         |
| Boursi 2016      | Logistic regression on difference between two most recent tests         | 6.3 years                                 | Sporadic                       |                               | 2                                      |                               |
| Chaturvedi 2010  | Logistic regression stratified by time between blood test and diagnosis | 6 years                                   | Regular intervals              | 1 year                        |                                        |                               |
| Edgren 2010      | AUC stratified by time between blood test and diagnosis                 | 5 years                                   | Sporadic                       |                               | 10                                     |                               |
| Edgren 2010      | Descriptive/Graphs only                                                 | 5 years                                   | Sporadic                       |                               | 10                                     |                               |
| Edgren 2010      | Logistic regression stratified by time between blood test and diagnosis | 5 years                                   | Sporadic                       |                               | 10                                     |                               |
| Feng 2020        | Cox regression with trends categorised                                  | 4 years                                   | Regular intervals              | 2 years                       | 3                                      |                               |
| Fuente 2019      | Descriptive/Graphs only                                                 | 2 years                                   | Sporadic                       |                               |                                        |                               |
| Furukawa 1984    | T-test comparing groups derived based on trends patterns                |                                           | Other                          |                               |                                        |                               |
| Giannakeas 2022  | Descriptive/Graphs only                                                 | 2 years                                   | Sporadic                       |                               | 2                                      |                               |
| Goldshstein 2010 | Mixed-effects models                                                    | 10 years                                  | Regular intervals              | 8 months                      |                                        |                               |
| Gradel 2020      | Descriptive/Graphs only                                                 | 30 days                                   | Unclear                        |                               |                                        |                               |
| Hauser 2021      | Descriptive/Graphs only                                                 | 6+ years                                  | Sporadic                       |                               |                                        |                               |
| Hsieh 2019       | Descriptive/Graphs only                                                 | 30 days                                   | Unclear                        |                               | 2+                                     |                               |
| Huang 2020       | Generalised estimating equation                                         | 3 years                                   | Unclear                        |                               |                                        |                               |
| Iversen 1996     | Linear regression including repeated blood tests                        | 6 years                                   | Sporadic                       |                               |                                        |                               |

|                 |                                                                        |            |                   |        |     |         |
|-----------------|------------------------------------------------------------------------|------------|-------------------|--------|-----|---------|
| Jacobson 2021   | Descriptive/Graphs only                                                |            | Unclear           |        |     |         |
| Jonsson 2020    | Orthogonal projections to latent structures                            | 11.7 years | Sporadic          |        | 2   | 256     |
| Koshiairis 2018 | Descriptive/Graphs only                                                | 5 years    | Sporadic          |        |     |         |
| Kubo 2016       | Descriptive/Graphs only                                                | 12 years   | Regular intervals | 1 year |     |         |
| Lemanska 2022   | Logistic regression per time interval between blood test and diagnosis | 6 years    | Sporadic          |        |     |         |
| Li 2021         | Mixed-effects models                                                   | 16.5 years | Sporadic          |        | 2   | 9486    |
| Pannala 2009    | Linear regression for cases and controls separately                    | 5 years    | Sporadic          |        |     |         |
| Rinaldi 2014    | Unclear                                                                | >11 years  | Unclear           |        |     |         |
| Sadr-Azodi 2015 | Logistic regression per time interval between blood test and diagnosis | >5 years   | Sporadic          |        |     |         |
| Sharma 2018     | Linear regression per time interval between blood test and diagnosis   | 5 years    | Sporadic          |        | 3.5 |         |
| Sharma 2018     | T-test stratified by time                                              | 5 years    | Sporadic          |        | 3.5 |         |
| Stroud 2020     | Cox regression on percentage change                                    | 12 months  | Regular intervals | 1 year | 2   |         |
| Tan 2023        | Joinpoint regression for cases and controls separately                 | 5 years    | Sporadic          |        |     |         |
| Toriola 2011    | Logistic regression on percentage change                               | 15 years   | Other             |        | 2   |         |
| Toriola 2011    | Logistic regression per time interval between blood test and diagnosis | 15 years   | Other             |        | 2   |         |
| Toriola 2013    | T-test of percentage change                                            | 3 years    | Other             |        | 2   |         |
| Virdee 2022     | Univariate joint models                                                | 10 years   | Sporadic          |        |     | 3068228 |



**Figure S2: Number of studies studying each cancer site**

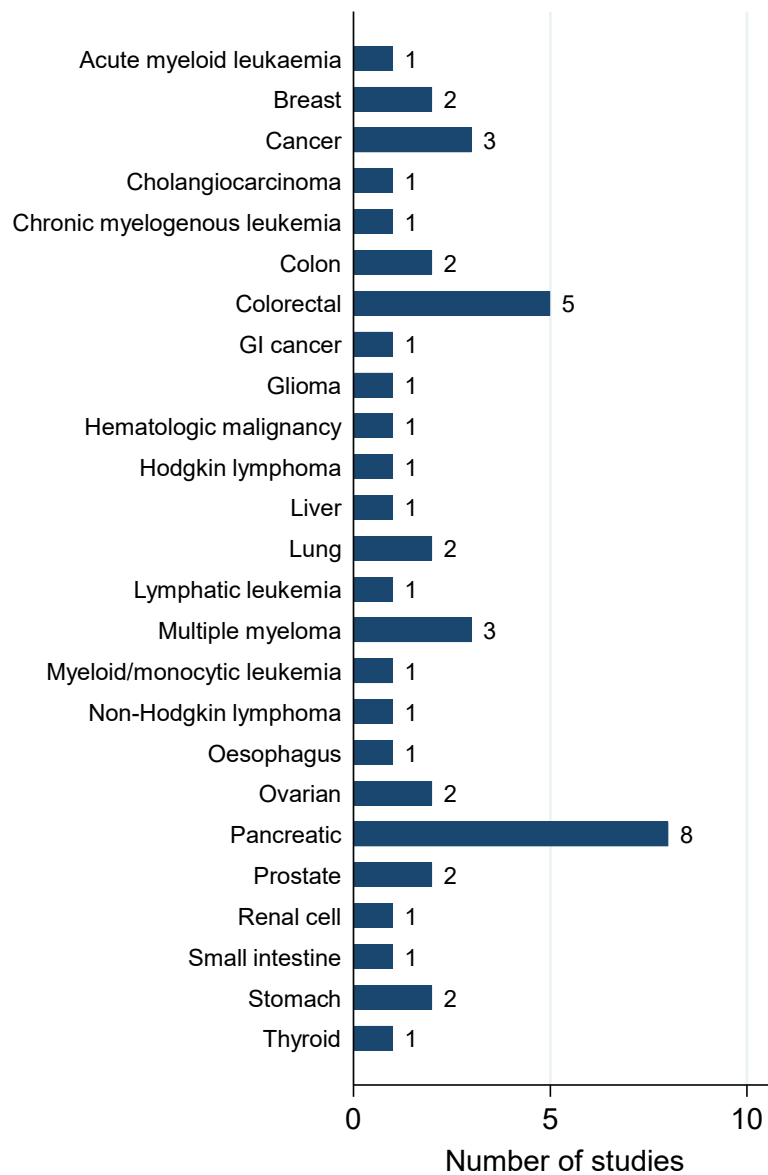

**Table S7: Analytic methods and findings of the association between blood test trend and cancer**

| Cancer | Blood Level     | Risk window <sup>1</sup> | Strata (if applicable) | Analytic approach                      | Results                                                                                                                                                                                                                                                                                                                                                                     | Article     |
|--------|-----------------|--------------------------|------------------------|----------------------------------------|-----------------------------------------------------------------------------------------------------------------------------------------------------------------------------------------------------------------------------------------------------------------------------------------------------------------------------------------------------------------------------|-------------|
| Breast | Haemoglobin     | -1 year                  |                        | Logistic regression stratified by time | OR=1.00 (0.95–1.05)                                                                                                                                                                                                                                                                                                                                                         | Edgren 2010 |
| Breast | Haemoglobin     | -1-2 years               |                        | AUC stratified by time                 | AUC=0.51 (0.49-0.52)                                                                                                                                                                                                                                                                                                                                                        | Edgren 2010 |
| Breast | Haemoglobin     | -1-2 years               |                        | Logistic regression stratified by time | OR=0.98 (0.93–1.03)                                                                                                                                                                                                                                                                                                                                                         | Edgren 2010 |
| Breast | Haemoglobin     | -2-3 years               |                        | Logistic regression stratified by time | OR=1.00 (0.95–1.06)                                                                                                                                                                                                                                                                                                                                                         | Edgren 2010 |
| Breast | Haemoglobin     | -3-4 years               |                        | Logistic regression stratified by time | OR=0.93 (0.88–0.99)                                                                                                                                                                                                                                                                                                                                                         | Edgren 2010 |
| Breast | Haemoglobin     | -4-5 years               |                        | Logistic regression stratified by time | OR=0.99 (0.93–1.05)                                                                                                                                                                                                                                                                                                                                                         | Edgren 2010 |
| Cancer | Blood glucose   | 7 years                  |                        | Cox regression on percentage change    | n=1572, cases=62, HR=%change=0.94 (0.90-0.99). Multivariable, adjusted for: Age at surgery, education, smoking history, insulin use, 12-month percentage weight change                                                                                                                                                                                                      | Stroud 2020 |
| Cancer | Fasting glucose | 6 years                  |                        | Cox regression with trends categorised | Group 1=Low-increasing, n=6275, cases=152, HR=1.26 (1.06–1.50). Group 2 (Ref)=Moderate-stable, n=44120, cases=818. Group 3=Moderate-increasing, n=10149, cases=215, HR=1.05 (0.90–1.22). Group 4=Elevated-decreasing, n=5244, cases=87, HR=0.93 (0.74–1.15). Group 5=Elevated-stable, n=3954, cases=92, HR=1.13 (0.91–1.41). Multivariable, adjusted for: Age, sex, income, | Feng 2020   |

|        |             |            |  |                                        |                                                                                                |             |
|--------|-------------|------------|--|----------------------------------------|------------------------------------------------------------------------------------------------|-------------|
|        |             |            |  |                                        | educational level, smoking, alcohol drinking, BMI at 2006, BMI percent change during 2006–2010 |             |
| Cancer | Haemoglobin | -1 year    |  | Logistic regression stratified by time | OR=1.06 (1.04–1.09)                                                                            | Edgren 2010 |
| Cancer | Haemoglobin | -1-2 years |  | AUC stratified by time                 | AUC=0.53 (0.53-0.54)                                                                           | Edgren 2010 |
| Cancer | Haemoglobin | -1-2 years |  | Logistic regression stratified by time | OR=0.99 (0.97–1.02)                                                                            | Edgren 2010 |
| Cancer | Haemoglobin | -2-3 years |  | Logistic regression stratified by time | OR=0.99 (0.96–1.01)                                                                            | Edgren 2010 |
| Cancer | Haemoglobin | -3-4 years |  | Logistic regression stratified by time | OR=0.95 (0.93–0.97)                                                                            | Edgren 2010 |
| Cancer | Haemoglobin | -4-5 years |  | Logistic regression stratified by time | OR=0.96 (0.94–0.99)                                                                            | Edgren 2010 |
| Colon  | Haemoglobin | -1 year    |  | Logistic regression stratified by time | OR=1.82 (1.64–2.01)                                                                            | Edgren 2010 |
| Colon  | Haemoglobin | -1-2 years |  | AUC stratified by time                 | AUC=0.62 (0.59-0.64)                                                                           | Edgren 2010 |
| Colon  | Haemoglobin | -1-2 years |  | Logistic regression stratified by time | OR=1.19 (1.08–1.32)                                                                            | Edgren 2010 |
| Colon  | Haemoglobin | -2-3 years |  | Logistic regression stratified by time | OR=1.06 (0.96–1.17)                                                                            | Edgren 2010 |
| Colon  | Haemoglobin | -3-4 years |  | Logistic regression stratified by time | OR=1.07 (0.97–1.18)                                                                            | Edgren 2010 |

|            |                    |            |         |                                                                 |                                                                                                                     |              |
|------------|--------------------|------------|---------|-----------------------------------------------------------------|---------------------------------------------------------------------------------------------------------------------|--------------|
| Colon      | Haemoglobin        | -4-5 years |         | Logistic regression stratified by time                          | OR=0.96 (0.87–1.05)                                                                                                 | Edgren 2010  |
| Colorectal | Albumin            | Unclear    |         | Logistic regression on difference between two most recent tests | n=9299, cases=36199, OR=0.84 (0.70-1.02)                                                                            | Boursi 2016  |
| Colorectal | Basophil count     | Diagnosis  | Females | Univariate joint models                                         | n=50000, cases=788, OR=Decline=0.225 (0.028, 1.835). Multivariable, adjusted for: Age at index (diagnosis, random)  | Virdee 2022  |
| Colorectal | Basophil count     | Diagnosis  | Males   | Univariate joint models                                         | n=50000, cases=1207, OR=Decline=0.210 (0.040, 1.101). Multivariable, adjusted for: Age at index (diagnosis, random) | Virdee 2022  |
| Colorectal | Blood glucose      | Unclear    |         | Logistic regression on difference between two most recent tests | n=9299, cases=36199, OR=0.96 (0.91-1.01)                                                                            | Boursi 2016  |
| Colorectal | C-reactive protein | Unclear    |         | T-test of percentage change                                     | Group 1=Case baseline (n=766), Group 2=Case 3 years (n=766), Results=0.58 (0.01 – 1.14)                             | Toriola 2013 |
| Colorectal | C-reactive protein | Unclear    |         | T-test of percentage change                                     | Group 1=Control baseline (n=875), Group 2=Control 3 years (n=875), Results=controls: -0.04 (-0.56 – 0.47)           | Toriola 2013 |
| Colorectal | Calcium            | Unclear    |         | Logistic regression on difference between two most recent tests | n=9299, cases=36199, OR=1.9 (0.65-5.52)                                                                             | Boursi 2016  |
| Colorectal | Eosinophil count   | Diagnosis  | Females | Univariate joint models                                         | n=50000, cases=796, HR=Decline=0.484 (0.252, 0.929). Multivariable, adjusted for: Age at index (diagnosis, random)  | Virdee 2022  |
| Colorectal | Eosinophil count   | Diagnosis  | Males   | Univariate joint models                                         | n=50000, cases=1233, HR=Decline=0.689 (0.440, 1.079). Multivariable, adjusted for: Age at index (diagnosis, random) | Virdee 2022  |

|            |                                |           |         |                                                                 |                                                                                                                                                                                                                                                                                                |                 |
|------------|--------------------------------|-----------|---------|-----------------------------------------------------------------|------------------------------------------------------------------------------------------------------------------------------------------------------------------------------------------------------------------------------------------------------------------------------------------------|-----------------|
| Colorectal | Haematocrit/Packed cell volume | Diagnosis | Females | Univariate joint models                                         | n=50000, cases=775, HR=Decline=1.001 (1.001, 1.001). Multivariable, adjusted for: Age at index (diagnosis, random)                                                                                                                                                                             | Virdee 2022     |
| Colorectal | Haematocrit/Packed cell volume | Diagnosis | Males   | Univariate joint models                                         | n=50000, cases=1274, HR=Decline=1.001 (1.001, 1.001). Multivariable, adjusted for: Age at index (diagnosis, random)                                                                                                                                                                            | Virdee 2022     |
| Colorectal | Haematocrit/Packed cell volume | Unclear   |         | Logistic regression on difference between two most recent tests | n=9299, cases=36199, OR=1.04 (0.98-1.11)                                                                                                                                                                                                                                                       | Boursi 2016     |
| Colorectal | Haemoglobin                    | Diagnosis |         | Mixed-effects models                                            | Method: Mixed-effects models. Result: Male controls: $Hb=0.09\ln(\text{time})+14.49$ , $R^2=0.83$ ), male cases: $Hb=0.48\ln(\text{time})+14.12$ , $R^2=0.98$ ); female controls: $Hb=0.04\ln(\text{time})+13.111$ , $R^2=0.65$ ), female cases: $Hb=0.3\ln(\text{time})+12.72$ , $R^2=0.97$ ) | Goldshtein 2010 |
| Colorectal | Haemoglobin                    | Diagnosis |         | Mixed-effects models                                            | Method: Mixed-effects models. Result: No results reported                                                                                                                                                                                                                                      | Li 2021         |
| Colorectal | Haemoglobin                    | Diagnosis | Females | Univariate joint models                                         | n=50000, cases=747, HR=Decline=2.037 (1.953, 2.128). Multivariable, adjusted for: Age at index (diagnosis, random)                                                                                                                                                                             | Virdee 2022     |
| Colorectal | Haemoglobin                    | Diagnosis | Males   | Univariate joint models                                         | n=50000, cases=1230, HR=Decline=1.783 (1.730, 1.835). Multivariable, adjusted for: Age at index (diagnosis, random)                                                                                                                                                                            | Virdee 2022     |
| Colorectal | Lymphocyte count               | Diagnosis | Females | Univariate joint models                                         | n=50000, cases=775, HR=Decline=1.215 (1.098, 1.346). Multivariable, adjusted for: Age at index (diagnosis, random)                                                                                                                                                                             | Virdee 2022     |
| Colorectal | Lymphocyte count               | Diagnosis | Males   | Univariate joint models                                         | n=50000, cases=1222, HR=Decline=1.235 (1.139, 1.339). Multivariable, adjusted for: Age at index (diagnosis, random)                                                                                                                                                                            | Virdee 2022     |

|            |                                     |           |         |                                                                 |                                                                                                                     |             |
|------------|-------------------------------------|-----------|---------|-----------------------------------------------------------------|---------------------------------------------------------------------------------------------------------------------|-------------|
| Colorectal | Mean cell haemoglobin               | Diagnosis | Females | Univariate joint models                                         | n=50000, cases=716, HR=Decline=1.333 (1.292, 1.376). Multivariable, adjusted for: Age at index (diagnosis, random)  | Virdee 2022 |
| Colorectal | Mean cell haemoglobin               | Diagnosis | Males   | Univariate joint models                                         | n=50000, cases=1134, HR=Decline=1.376 (1.342, 1.410). Multivariable, adjusted for: Age at index (diagnosis, random) | Virdee 2022 |
| Colorectal | Mean cell haemoglobin               | Unclear   |         | Logistic regression on difference between two most recent tests | n=9299, cases=36199, OR=1.27 (1.04-1.55)                                                                            | Boursi 2016 |
| Colorectal | Mean cell haemoglobin concentration | Diagnosis | Females | Univariate joint models                                         | n=50000, cases=736, HR=Decline=1.862 (1.748, 1.984). Multivariable, adjusted for: Age at index (diagnosis, random)  | Virdee 2022 |
| Colorectal | Mean cell haemoglobin concentration | Diagnosis | Males   | Univariate joint models                                         | n=50000, cases=1178, HR=Decline=2.169 (2.053, 2.288). Multivariable, adjusted for: Age at index (diagnosis, random) | Virdee 2022 |
| Colorectal | Mean cell volume                    | Diagnosis | Females | Univariate joint models                                         | n=50000, cases=758, HR=Decline=1.110 (1.100, 1.121). Multivariable, adjusted for: Age at index (diagnosis, random)  | Virdee 2022 |
| Colorectal | Mean cell volume                    | Diagnosis | Males   | Univariate joint models                                         | n=50000, cases=1181, HR=Decline=1.124 (1.116, 1.133). Multivariable, adjusted for: Age at index (diagnosis, random) | Virdee 2022 |
| Colorectal | Mean cell volume                    | Unclear   |         | Logistic regression on difference between two most recent tests | n=9299, cases=36199, OR=1.23 (1.01-1.51)                                                                            | Boursi 2016 |
| Colorectal | Mean platelet volume                | Diagnosis | Females | Univariate joint models                                         | n=50000, cases=734, HR=Decline=1.155 (1.092, 1.221). Multivariable, adjusted for: Age at index (diagnosis, random)  | Virdee 2022 |

|            |                      |           |         |                         |                                                                                                                      |             |
|------------|----------------------|-----------|---------|-------------------------|----------------------------------------------------------------------------------------------------------------------|-------------|
| Colorectal | Mean platelet volume | Diagnosis | Males   | Univariate joint models | n=50000, cases=1901, HR=Decline=1.142 (1.089, 1.196). Multivariable, adjusted for: Age at index (diagnosis, random)  | Virdee 2022 |
| Colorectal | Monocyte count       | Diagnosis | Females | Univariate joint models | n=50000, cases=784, HR=Increase=2.210 (1.691, 2.889). Multivariable, adjusted for: Age at index (diagnosis, random)  | Virdee 2022 |
| Colorectal | Monocyte count       | Diagnosis | Males   | Univariate joint models | n=50000, cases=1164, HR=Increase=1.729 (1.463, 2.043). Multivariable, adjusted for: Age at index (diagnosis, random) | Virdee 2022 |
| Colorectal | Neutrophil count     | Diagnosis | Females | Univariate joint models | n=50000, cases=785, HR=Decline=1.093 (1.065, 1.121). Multivariable, adjusted for: Age at index (diagnosis, random)   | Virdee 2022 |
| Colorectal | Neutrophil count     | Diagnosis | Males   | Univariate joint models | n=50000, cases=1186, HR=Decline=1.018 (0.970, 1.068). Multivariable, adjusted for: Age at index (diagnosis, random)  | Virdee 2022 |
| Colorectal | Platelet count       | Diagnosis | Females | Univariate joint models | n=50000, cases=718, HR=Increase=1.007 (1.006, 1.007). Multivariable, adjusted for: Age at index (diagnosis, random)  | Virdee 2022 |
| Colorectal | Platelet count       | Diagnosis | Males   | Univariate joint models | n=50000, cases=1107, HR=Increase=1.007 (1.006, 1.007). Multivariable, adjusted for: Age at index (diagnosis, random) | Virdee 2022 |
| Colorectal | Red blood cell count | Diagnosis | Females | Univariate joint models | n=50000, cases=734, HR=Decline=2.551 (2.132, 3.049). Multivariable, adjusted for: Age at index (diagnosis, random)   | Virdee 2022 |
| Colorectal | Red blood cell count | Diagnosis | Males   | Univariate joint models | n=50000, cases=1135, HR=Decline=1.957 (1.706, 2.242). Multivariable, adjusted for: Age at index (diagnosis, random)  | Virdee 2022 |

|                  |                        |           |         |                                                                 |                                                                                                                                                                                                                                                                                                                                                                                                                                                                          |              |
|------------------|------------------------|-----------|---------|-----------------------------------------------------------------|--------------------------------------------------------------------------------------------------------------------------------------------------------------------------------------------------------------------------------------------------------------------------------------------------------------------------------------------------------------------------------------------------------------------------------------------------------------------------|--------------|
| Colorectal       | Red blood cell count   | Unclear   |         | Logistic regression on difference between two most recent tests | n=9299, cases=36199, OR=1.09 (0.97-1.23)                                                                                                                                                                                                                                                                                                                                                                                                                                 | Boursi 2016  |
| Colorectal       | White blood cell count | Diagnosis | Females | Univariate joint models                                         | n=50000, cases=809, HR=Increase=1.047 (0.973, 1.128). Multivariable, adjusted for: Age at index (diagnosis, random)                                                                                                                                                                                                                                                                                                                                                      | Virdee 2022  |
| Colorectal       | White blood cell count | Diagnosis | Males   | Univariate joint models                                         | n=50000, cases=1203, HR=Increase=1.054 (1.012, 1.098). Multivariable, adjusted for: Age at index (diagnosis, random)                                                                                                                                                                                                                                                                                                                                                     | Virdee 2022  |
| Colorectal       | White blood cell count | Unclear   |         | Logistic regression on difference between two most recent tests | n=9299, cases=36199, OR=0.97 (0.94-1.00)                                                                                                                                                                                                                                                                                                                                                                                                                                 | Boursi 2016  |
| GI cancer        | Fasting glucose        | 6 years   |         | Cox regression with trends categorised                          | Group 1=Low-increasing, n=6275, cases=39, OR=0.97 (0.69–1.36). Group 2 (Ref)=Moderate-stable, n=44120, cases=282. Group 3=Moderate-increasing, n=10149, cases=71, OR=0.97 (0.75–1.26). Group 4=Elevated-decreasing, n=5244, cases=31, OR=0.91 (0.63–1.32). Group 5=Elevated-stable, n=3954, cases=49, OR=1.66 (1.22–2.26). Multivariable, adjusted for: Age, sex, income, educational level, smoking, alcohol drinking, BMI at 2006, BMI percent change during 2006–2010 | Feng 2020    |
| Glioma           | Creatinine             | Diagnosis |         | Orthogonal projections to latent structures                     | Method: Orthogonal projections to latent structures. Result: No results reported                                                                                                                                                                                                                                                                                                                                                                                         | Jonsson 2020 |
| Glioma           | Urea                   | Diagnosis |         | Orthogonal projections to latent structures                     | Method: Orthogonal projections to latent structures. Result: No results reported                                                                                                                                                                                                                                                                                                                                                                                         | Jonsson 2020 |
| Hodgkin lymphoma | Haemoglobin            | -1 year   |         | Logistic regression stratified by time                          | OR=1.72 (1.37–2.16)                                                                                                                                                                                                                                                                                                                                                                                                                                                      | Edgren 2010  |



|                  |                        |            |  |                                                          |                                                                                                                                                                               |                 |
|------------------|------------------------|------------|--|----------------------------------------------------------|-------------------------------------------------------------------------------------------------------------------------------------------------------------------------------|-----------------|
| Hodgkin lymphoma | Haemoglobin            | -1-2 years |  | AUC stratified by time                                   | AUC=0.59 (0.53-0.56)                                                                                                                                                          | Edgren 2010     |
| Hodgkin lymphoma | Haemoglobin            | -1-2 years |  | Logistic regression stratified by time                   | OR=1.26 (1.00–1.59)                                                                                                                                                           | Edgren 2010     |
| Hodgkin lymphoma | Haemoglobin            | -2-3 years |  | Logistic regression stratified by time                   | OR=0.99 (0.80–1.24)                                                                                                                                                           | Edgren 2010     |
| Hodgkin lymphoma | Haemoglobin            | -3-4 years |  | Logistic regression stratified by time                   | OR=0.98 (0.78–1.23)                                                                                                                                                           | Edgren 2010     |
| Hodgkin lymphoma | Haemoglobin            | -4-5 years |  | Logistic regression stratified by time                   | OR=0.87 (0.69–1.11)                                                                                                                                                           | Edgren 2010     |
| Liver            | Aspartate transaminase | Diagnosis  |  | T-test comparing groups derived based on trends patterns | Group 1=fluctuating trend over >20ng/mL (n=18), Group 2=Type 3: <20ng/ml throughout (n=8), Results=p<0.01                                                                     | Furukawa 1984   |
| Liver            | Aspartate transaminase | Diagnosis  |  | T-test comparing groups derived based on trends patterns | Group 1=fluctuating trend over >20ng/mL (n=18), Group 2=spike shaped rise but mostly <20ng/ml (n=3), Results=p<0.05                                                           | Furukawa 1984   |
| Lung             | C-reactive protein     | 1 year     |  | Logistic regression stratified by time                   | Group 1 (Ref)=<=1; n=274, cases=168. Group 2=1.1-2.7; n=312, cases=176. Group 3=2.8-5.5; n=317, cases=167. Group 4=>=5.6; n=359, cases=159. All HRs statistically significant | Chaturvedi 2010 |
| Lung             | C-reactive protein     | 1-2 years  |  | Logistic regression stratified by time                   | Group 1 (Ref)=<=1. Group 2=1.1-2.7. Group 3=2.8-5.5. Group 4=>=5.6. All HRs statistically significant                                                                         | Chaturvedi 2010 |
| Lung             | C-reactive protein     | 2-5 years  |  | Logistic regression stratified by time                   | Group 1 (Ref)=<=1. Group 2=1.1-2.7. Group 3=2.8-5.5. Group 4=>=5.6. All HRs statistically significant                                                                         | Chaturvedi 2010 |
| Lung             | C-reactive protein     | 5+ years   |  | Logistic regression stratified by time                   | Group 1 (Ref)=<=1. Group 2=1.1-2.7. Group 3=2.8-5.5. Group 4=>=5.6. All HRs statistically significant                                                                         | Chaturvedi 2010 |

|                    |                                |            |  |                                        |                                                                                                       |                 |
|--------------------|--------------------------------|------------|--|----------------------------------------|-------------------------------------------------------------------------------------------------------|-----------------|
| Lung               | C-reactive protein             | Diagnosis  |  | Logistic regression stratified by time | Group 1 (Ref)=<=1. Group 2=1.1-2.7. Group 3=2.8-5.5. Group 4=>=5.6. All HRs statistically significant | Chaturvedi 2010 |
| Lymphatic leukemia | Haemoglobin                    | -1 year    |  | Logistic regression stratified by time | OR=1.74 (1.42–2.13)                                                                                   | Edgren 2010     |
| Lymphatic leukemia | Haemoglobin                    | -1-2 years |  | AUC stratified by time                 | AUC=0.55 (0.49-0.60)                                                                                  | Edgren 2010     |
| Lymphatic leukemia | Haemoglobin                    | -1-2 years |  | Logistic regression stratified by time | OR=1.35 (1.11–1.65)                                                                                   | Edgren 2010     |
| Lymphatic leukemia | Haemoglobin                    | -2-3 years |  | Logistic regression stratified by time | OR=1.38 (1.12–1.70)                                                                                   | Edgren 2010     |
| Lymphatic leukemia | Haemoglobin                    | -3-4 years |  | Logistic regression stratified by time | OR=1.08 (0.89–1.31)                                                                                   | Edgren 2010     |
| Lymphatic leukemia | Haemoglobin                    | -4-5 years |  | Logistic regression stratified by time | OR=1.28 (1.05–1.56)                                                                                   | Edgren 2010     |
| Multiple myeloma   | Calcium adjusted               | Diagnosis  |  | One-way repeated measures ANOVA        | Group 1=0-90 days, Group 2=90-180 days, Group 3=180-210 days. P=Unknown                               | Atkin 2020      |
| Multiple myeloma   | Creatinine                     | Diagnosis  |  | One-way repeated measures ANOVA        | Group 1=0-90 days, Group 2=90-180 days, Group 3=180-210 days. P=Unknown                               | Atkin 2020      |
| Multiple myeloma   | Haematocrit/Packed cell volume | Diagnosis  |  | One-way repeated measures ANOVA        | Group 1=0-90 days, Group 2=90-180 days, Group 3=180-210 days. P=Not significant                       | Atkin 2020      |
| Multiple myeloma   | Haemoglobin                    | -1 year    |  | Logistic regression stratified by time | OR=2.50 (1.94–3.23)                                                                                   | Edgren 2010     |
| Multiple myeloma   | Haemoglobin                    | -1-2 years |  | AUC stratified by time                 | AUC=0.71 (0.65-0.78)                                                                                  | Edgren 2010     |

|                            |             |            |  |                                        |                                                                       |             |
|----------------------------|-------------|------------|--|----------------------------------------|-----------------------------------------------------------------------|-------------|
| Multiple myeloma           | Haemoglobin | -1-2 years |  | Logistic regression stratified by time | OR=1.58 (1.24–2.02)                                                   | Edgren 2010 |
| Multiple myeloma           | Haemoglobin | -2-3 years |  | Logistic regression stratified by time | OR=1.42 (1.14–1.77)                                                   | Edgren 2010 |
| Multiple myeloma           | Haemoglobin | -3-4 years |  | Logistic regression stratified by time | OR=1.21 (0.96–1.52)                                                   | Edgren 2010 |
| Multiple myeloma           | Haemoglobin | -4-5 years |  | Logistic regression stratified by time | OR=1.13 (0.90–1.43)                                                   | Edgren 2010 |
| Multiple myeloma           | Haemoglobin | Diagnosis  |  | One-way repeated measures ANOVA        | Group 1=0-90 days, Group 2=90-180 days, Group 3=180-210 days. P=.0005 | Atkin 2020  |
| Myeloid/monocytic leukemia | Haemoglobin | -1 year    |  | Logistic regression stratified by time | OR=2.29 (1.82–2.89)                                                   | Edgren 2010 |
| Myeloid/monocytic leukemia | Haemoglobin | -1-2 years |  | AUC stratified by time                 | AUC=0.71 (0.65-0.77)                                                  | Edgren 2010 |
| Myeloid/monocytic leukemia | Haemoglobin | -1-2 years |  | Logistic regression stratified by time | OR=1.14 (0.94–1.39)                                                   | Edgren 2010 |
| Myeloid/monocytic leukemia | Haemoglobin | -2-3 years |  | Logistic regression stratified by time | OR=1.08 (0.87–1.35)                                                   | Edgren 2010 |
| Myeloid/monocytic leukemia | Haemoglobin | -3-4 years |  | Logistic regression stratified by time | OR=1.14 (0.92–1.40)                                                   | Edgren 2010 |
| Myeloid/monocytic leukemia | Haemoglobin | -4-5 years |  | Logistic regression stratified by time | OR=1.01 (0.82–1.24)                                                   | Edgren 2010 |
| Non-Hodgkin lymphoma       | Haemoglobin | -1 year    |  | Logistic regression stratified by time | OR=1.30 (1.15–1.48)                                                   | Edgren 2010 |

|                      |                    |            |  |                                          |                                                                                                                                                                                     |              |
|----------------------|--------------------|------------|--|------------------------------------------|-------------------------------------------------------------------------------------------------------------------------------------------------------------------------------------|--------------|
| Non-Hodgkin lymphoma | Haemoglobin        | -1-2 years |  | AUC stratified by time                   | AUC=0.57 (0.54-0.60)                                                                                                                                                                | Edgren 2010  |
| Non-Hodgkin lymphoma | Haemoglobin        | -1-2 years |  | Logistic regression stratified by time   | OR=1.06 (0.94–1.19)                                                                                                                                                                 | Edgren 2010  |
| Non-Hodgkin lymphoma | Haemoglobin        | -2-3 years |  | Logistic regression stratified by time   | OR=0.98 (0.87–1.10)                                                                                                                                                                 | Edgren 2010  |
| Non-Hodgkin lymphoma | Haemoglobin        | -3-4 years |  | Logistic regression stratified by time   | OR=0.91 (0.81–1.03)                                                                                                                                                                 | Edgren 2010  |
| Non-Hodgkin lymphoma | Haemoglobin        | -4-5 years |  | Logistic regression stratified by time   | OR=0.95 (0.85–1.07)                                                                                                                                                                 | Edgren 2010  |
| Oesophagus           | Haemoglobin        | -1 year    |  | Logistic regression stratified by time   | OR=1.22 (0.94–1.57)                                                                                                                                                                 | Edgren 2010  |
| Oesophagus           | Haemoglobin        | -1-2 years |  | AUC stratified by time                   | AUC=0.60 (0.51-0.69)                                                                                                                                                                | Edgren 2010  |
| Oesophagus           | Haemoglobin        | -1-2 years |  | Logistic regression stratified by time   | OR=1.12 (0.85–1.49)                                                                                                                                                                 | Edgren 2010  |
| Oesophagus           | Haemoglobin        | -2-3 years |  | Logistic regression stratified by time   | OR=0.98 (0.74–1.30)                                                                                                                                                                 | Edgren 2010  |
| Oesophagus           | Haemoglobin        | -3-4 years |  | Logistic regression stratified by time   | OR=1.01 (0.77–1.34)                                                                                                                                                                 | Edgren 2010  |
| Oesophagus           | Haemoglobin        | -4-5 years |  | Logistic regression stratified by time   | OR=1.01 (0.77–1.34)                                                                                                                                                                 | Edgren 2010  |
| Ovarian              | C-reactive protein | Diagnosis  |  | Logistic regression on percentage change | Group 1 (Ref)=Little change; n=206, cases=91. Group 2=Substantial decrease; n=33, cases=17, OR=1.56 (0.71–3.45). Group 3=Substantial increase; n=101, cases=62, OR=1.90 (1.12–3.23) | Toriola 2011 |

|            |                           |           |          |                                                        |                                                                                                                                                                                                                                                                                                                                                                                                                                                                                             |              |
|------------|---------------------------|-----------|----------|--------------------------------------------------------|---------------------------------------------------------------------------------------------------------------------------------------------------------------------------------------------------------------------------------------------------------------------------------------------------------------------------------------------------------------------------------------------------------------------------------------------------------------------------------------------|--------------|
| Ovarian    | C-reactive protein        | Diagnosis | Sample 1 | Logistic regression per time-point                     | Group 1 (Ref)=<1.1; n=104, cases=47. Group 2=1.1 to <=2.6; n=113, cases=56, OR=1.35 (0.77–2.35). Group 3=>2.6; n=123, cases=67, OR=1.62 (0.93–2.83). Multivariable, adjusted for: Age at blood test                                                                                                                                                                                                                                                                                         | Toriola 2011 |
| Ovarian    | C-reactive protein        | Diagnosis | Sample 2 | Logistic regression per time-point                     | Group 1 (Ref)=<1.1; n=104, cases=48. Group 2=1.1 to <=2.6; n=104, cases=44, OR=0.97 (0.56–1.62). Group 3=>2.6; n=132, cases=78, OR=1.96 (1.11–3.49). Multivariable, adjusted for: Age at blood test                                                                                                                                                                                                                                                                                         | Toriola 2011 |
| Pancreatic | Alanine aminotransaminase | Diagnosis |          | Joinpoint regression for cases and controls separately | Method: Joinpoint regression for cases and controls separately. Result: Case+recent T2D: time -60 to -9 coef=-0.08, time -9 to -3 coef=14.18; Case+long-standing T2D: -60 to -9 coef=-0.12, time -9 to -3 coef=14.25; Case+no T2D: time -60 to -9 coef=-0.00, time -9 to -3 coef=18.14; Control+recent T2D: time -60 to -39 coef=0.08, time -39 to -3 coef=-0.09; Control+long-standing T2D: time -60 to -3 coef=-0.07; Control+no T2D: time -60 to -3 coef=-0.03                           | Tan 2023     |
| Pancreatic | Aspartate transaminase    | Diagnosis |          | Joinpoint regression for cases and controls separately | Method: Joinpoint regression for cases and controls separately. Result: Case+recent T2D: time -60 to -9 coef=0.08, time -9 to -3 coef=10.65; Case+long-standing T2D: -60 to -9 coef=-0.03, time -9 to -3 coef=12.13; Case+no T2D: time -60 to -9 coef=0.03, time -9 to -3 coef=13.00; Control+recent T2D: time -60 to -51 coef=-0.24, time -51 to -42 coef=0.49, time -42 to -3 coef=-0.07; Control+long-standing T2D: time -60 to -3 coef=-0.01; Control+no T2D: time -60 to -3 coef=-0.00 | Tan 2023     |
| Pancreatic | Bilirubin                 | Diagnosis |          | Joinpoint regression for cases and controls separately | Method: Joinpoint regression for cases and controls separately. Result: Case+recent T2D: time -60 to -9 coef=-0.03, time -9 to -3 coef=5.45; Case+long-standing T2D: -60 to -9 coef=-0.04, time -9 to -3                                                                                                                                                                                                                                                                                    | Tan 2023     |

|            |                 |         |  |                           |                                                                                                                                                                                                                                                                                                       |             |
|------------|-----------------|---------|--|---------------------------|-------------------------------------------------------------------------------------------------------------------------------------------------------------------------------------------------------------------------------------------------------------------------------------------------------|-------------|
|            |                 |         |  |                           | coef=5.41; Case+no T2D: time -60 to -9 coef=-0.04, time -9 to -3 coef=6.91; Control+recent T2D: time -60 to -9 coef=-0.00, time -9 to -3 coef=0.16; Control+long-standing T2D: time -60 to -9 coef=-0.01, time -9 to -3 coef=0.22; Control+no T2D: time -60 to -9 coef=-0.01, time -9 to -3 coef=0.40 |             |
| Pancreatic | Fasting glucose | -0-6m   |  | T-test stratified by time | Group 1=Cancer (n=159, mean=134), Group 2=No cancer (n=123, mean=108), Results=p<0.001                                                                                                                                                                                                                | Sharma 2018 |
| Pancreatic | Fasting glucose | -12-18m |  | T-test stratified by time | Group 1=Cancer (n=90, mean=118), Group 2=No cancer (n=123, mean=106), Results=p<0.001                                                                                                                                                                                                                 | Sharma 2018 |
| Pancreatic | Fasting glucose | -18-24m |  | T-test stratified by time | Group 1=Cancer (n=69, mean=115), Group 2=No cancer (n=86, mean=106), Results=p=0.02                                                                                                                                                                                                                   | Sharma 2018 |
| Pancreatic | Fasting glucose | -24-30m |  | T-test stratified by time | Group 1=Cancer (n=71, mean=114), Group 2=No cancer (n=128, mean=105), Results=p=0.009                                                                                                                                                                                                                 | Sharma 2018 |
| Pancreatic | Fasting glucose | -30-36m |  | T-test stratified by time | Group 1=Cancer (n=68, mean=112), Group 2=No cancer (n=116, mean=104), Results=p=0.01                                                                                                                                                                                                                  | Sharma 2018 |
| Pancreatic | Fasting glucose | -36-42m |  | T-test stratified by time | Group 1=Cancer (n=61, mean=106), Group 2=No cancer (n=125, mean=105), Results=p=0.62                                                                                                                                                                                                                  | Sharma 2018 |
| Pancreatic | Fasting glucose | -42-48m |  | T-test stratified by time | Group 1=Cancer (n=60, mean=105), Group 2=No cancer (n=99, mean=104), Results=p=0.57                                                                                                                                                                                                                   | Sharma 2018 |
| Pancreatic | Fasting glucose | -48-54m |  | T-test stratified by time | Group 1=Cancer (n=72, mean=104), Group 2=No cancer (n=122, mean=105), Results=p=0.70                                                                                                                                                                                                                  | Sharma 2018 |
| Pancreatic | Fasting glucose | -54-60m |  | T-test stratified by time | Group 1=Cancer (n=81, mean=103), Group 2=No cancer (n=106, mean=103), Results=p=0.91                                                                                                                                                                                                                  | Sharma 2018 |
| Pancreatic | Fasting glucose | -6-12m  |  | T-test stratified by time | Group 1=Cancer (n=88, mean=127), Group 2=No cancer (n=93, mean=106), Results=p<0.001                                                                                                                                                                                                                  | Sharma 2018 |

|            |                 |             |  |                                                        |                                                                                                                                                                                                                                                                                                                                                                                                                                                                                                                                                                                                              |                 |
|------------|-----------------|-------------|--|--------------------------------------------------------|--------------------------------------------------------------------------------------------------------------------------------------------------------------------------------------------------------------------------------------------------------------------------------------------------------------------------------------------------------------------------------------------------------------------------------------------------------------------------------------------------------------------------------------------------------------------------------------------------------------|-----------------|
| Pancreatic | Fasting glucose | 3 years     |  | Generalised estimating equation                        | Method: Generalised estimating equation. Result: Having adjusted for age, sex, and race as covariates and patient as the clustering variable, the slope from 3yr to 1m before diabetes diagnosis in cases=1.19 (0.71 to 1.67) and non-cases=0.81 (0.78 to 0.84). P=values for differences in slopes between cases and controls taken from a third GEE model including a time*case status interaction, p=0.06. Results did not differ much when assessed in subgroups of white, asian, black, hispanic.                                                                                                       | Huang 2020      |
| Pancreatic | Fasting glucose | Diagnosis   |  | Linear regression for cases and controls separately    | Method: Linear regression for cases and controls separately. Result: Cases: FGB=99.71+(5.08*time); controls=FGB=100.39+(0.40*time)                                                                                                                                                                                                                                                                                                                                                                                                                                                                           | Pannala 2009    |
| Pancreatic | Fasting glucose | Diagnosis   |  | Linear regression per time interval                    | Method: Linear regression per time interval. Result: No model results were reported - only the predicted trend graphically                                                                                                                                                                                                                                                                                                                                                                                                                                                                                   | Sharma 2018     |
| Pancreatic | Haemoglobin     | Diagnosis   |  | Joinpoint regression for cases and controls separately | Method: Joinpoint regression for cases and controls separately. Result: Case+recent T2D: time -60 to -24 coef=-0.01, time -24 to -9 coef=-0.02, time -9 to -3 coef=-0.11; Case+long-standing T2D: -60 to -9 coef=-0.01, time -9 to -3 coef=-0.11; Case+no T2D: time -60 to -21 coef=-0.00, time -21 to -9 coef=-0.02, time -9 to -3 coef=-0.10; Control+recent T2D: time -60 to -33 coef=-0.00, time -33 to -3 coef=-0.01; Control+long-standing T2D: time -60 to -54 coef=-0.00, time -54 to -9 coef=-0.01, time -9 to -3 coef=-0.02; Control+no T2D: time -60 to -27 coef=-0.00, time -27 to -3 coef=-0.01 | Tan 2023        |
| Pancreatic | HbA1C           | -0-6 months |  | Logistic regression per time-point                     | Group 1 (Ref)=27 – 45; n=144, cases=6. Group 2=46 – 51; n=166, cases=14, OR=2.18 (0.80 – 5.98). Group 3=52 – 60; n=150, cases=10, OR=1.46 (0.51 – 4.23).                                                                                                                                                                                                                                                                                                                                                                                                                                                     | Sadr-Azodi 2015 |

|            |       |              |  |                                    |                                                                                                                                                                                                                                                                                                                                                          |                 |
|------------|-------|--------------|--|------------------------------------|----------------------------------------------------------------------------------------------------------------------------------------------------------------------------------------------------------------------------------------------------------------------------------------------------------------------------------------------------------|-----------------|
|            |       |              |  |                                    | Group 4=61 – 145; n=167, cases=27, OR=4.73 (1.83 – 12.21). Multivariable, adjusted for: Education, smoking, body mass index, alcohol abuse, complicated diabetes disease, previous pancreatitis                                                                                                                                                          |                 |
| Pancreatic | HbA1C | -1-2 years   |  | Logistic regression per time-point | Group 1 (Ref)=27 – 45; n=186, cases=11. Group 2=46 – 51; n=198, cases=16, OR=1.37 (0.61 – 3.11). Group 3=52 – 60; n=192, cases=17, OR=1.56 (0.69 – 3.52). Group 4=61 – 145; n=183, cases=25, OR=2.51 (1.17 – 5.40). Multivariable, adjusted for: Education, smoking, body mass index, alcohol abuse, complicated diabetes disease, previous pancreatitis | Sadr-Azodi 2015 |
| Pancreatic | HbA1C | -2-5 years   |  | Logistic regression per time-point | Group 1 (Ref)=27 – 45; n=338, cases=21. Group 2=46 – 51; n=395, cases=36, OR=1.52 (0.86 – 2.70). Group 3=52 – 60; n=444, cases=47, OR=1.86 (1.07 – 3.25). Group 4=61 – 145; n=394, cases=39, OR=1.77 (0.99 – 3.19). Multivariable, adjusted for: Education, smoking, body mass index, alcohol abuse, complicated diabetes disease, previous pancreatitis | Sadr-Azodi 2015 |
| Pancreatic | HbA1C | -5+ years    |  | Logistic regression per time-point | Group 1 (Ref)=27 – 45; n=141, cases=14. Group 2=46 – 51; n=151, cases=15, OR=0.91 (0.41 – 2.02). Group 3=52 – 60; n=232, cases=23, OR=0.98 (0.47 – 2.04). Group 4=61 – 145; n=333, cases=26, OR=0.69 (0.32 – 1.48). Multivariable, adjusted for: Education, smoking, body mass index, alcohol abuse, complicated diabetes disease, previous pancreatitis | Sadr-Azodi 2015 |
| Pancreatic | HbA1C | -6-12 months |  | Logistic regression per time-point | Group 1 (Ref)=27 – 45; n=104, cases=6. Group 2=46 – 51; n=131, cases=7, OR=0.87 (0.27 – 2.80). Group 3=52 – 60; n=132, cases=15, OR=2.24 (0.82 – 6.13). Group 4=61 – 145; n=117, cases=16, OR=2.70 (0.99 – 7.36). Multivariable, adjusted for: Education,                                                                                                | Sadr-Azodi 2015 |



|            |       |           |  |                                                        |                                                                                                                                                                                                                                                                                                                                                                                                                                                                                                                                                                                                                                                     |               |
|------------|-------|-----------|--|--------------------------------------------------------|-----------------------------------------------------------------------------------------------------------------------------------------------------------------------------------------------------------------------------------------------------------------------------------------------------------------------------------------------------------------------------------------------------------------------------------------------------------------------------------------------------------------------------------------------------------------------------------------------------------------------------------------------------|---------------|
|            |       |           |  |                                                        | smoking, body mass index, alcohol abuse, complicated diabetes disease, previous pancreatitis                                                                                                                                                                                                                                                                                                                                                                                                                                                                                                                                                        |               |
| Pancreatic | HbA1C | 3 years   |  | Generalised estimating equation                        | Method: Generalised estimating equation. Result: Having adjusted for age, sex, and race as covariates and patient as the clustering variable, the slope from 3yr to 1m before diabetes diagnosis in cases=0.03 (0.00 to 0.06) and non-cases=0.04 (0.04 to 0.04). P=values for differences in slopes between cases and controls taken from a third GEE model including a time*case status interaction, p=0.38. Results did not differ much when assessed in subgroups of white, asian, black, hispanic.                                                                                                                                              | Huang 2020    |
| Pancreatic | HbA1C | Diagnosis |  | Joinpoint regression for cases and controls separately | Method: Joinpoint regression for cases and controls separately. Result: Case+recent T2D: time -60 to -42 coef=0.16, time -42 to -33 coef=0.78, time -33 to -21 coef=-0.12, time -21 to -3 coef=0.46; Case+long-standing T2D: -60 to -33 coef=0.04, time -33 to -18 coef=0.16, time -18 to -3=0.42; Case+no T2D: time -60 to -33 coef=-0.04, time -33 to -18 coef=0.09, time -18 to -9=0.21, time -9 to -3 coef=0.40; Control+recent T2D: time -60 to -45 coef=0.08, time -45 to -36 coef=0.71, time -36 to -3 coef=-0.07; Control+long-standing T2D: time -60 to -3 coef=0.01; Control+no T2D: time -60 to -30 coef=-0.02, time -30 to -3 coef=0.01 | Tan 2023      |
| Pancreatic | HbA1C | Diagnosis |  | Logistic regression per time-point                     | n=43756, cases=8777, OR=Diagnosis=1.18 (1.17 to 1.19), p<0.001; -1y=1.05 (1.05 to 1.06), p<0.001; -2y=1.01 (1.01 to 1.02), p<0.001; -3y=1.00 (1.00 to 1.01), p=0.226; -4y=1.00 (1.00 to 1.01), p=0.936; -4y=1.00 (0.99 to 1.00), p=0.614. Multivariable, adjusted for: Age, sex, diabetes                                                                                                                                                                                                                                                                                                                                                           | Lemanska 2022 |

|            |                        |            |  |                                                        |                                                                                                                                                                                                                                                                                                                                                                                                                                                                                         |             |
|------------|------------------------|------------|--|--------------------------------------------------------|-----------------------------------------------------------------------------------------------------------------------------------------------------------------------------------------------------------------------------------------------------------------------------------------------------------------------------------------------------------------------------------------------------------------------------------------------------------------------------------------|-------------|
| Pancreatic | Platelet count         | Diagnosis  |  | Joinpoint regression for cases and controls separately | Method: Joinpoint regression for cases and controls separately. Result: Case+recent T2D: time -60 to -9 coef=-0.16, time -9 to -3 coef=2.82; Case+long-standing T2D: -60 to -9 coef=-0.02, time -9 to -3 coef=4.23; Case+no T2D: time -60 to -9 coef=-0.06, time -9 to -3 coef=4.06; Control+recent T2D: time -60 to -3 coef=-0.13; Control+long-standing T2D: time -60 to -15 coef=-0.02, time -15 to -3 coef=0.13; Control+no T2D: time -60 to -9 coef=-0.05, time -9 to -3 coef=0.41 | Tan 2023    |
| Pancreatic | White blood cell count | Diagnosis  |  | Joinpoint regression for cases and controls separately | Method: Joinpoint regression for cases and controls separately. Result: Case+recent T2D: time -60 to -9 coef=0.00, time -9 to -3 coef=0.13; Case+long-standing T2D: -60 to -9 coef=-0.00, time -9 to -3 coef=-0.16; Case+no T2D: time -60 to -9 coef=0.00, time -9 to -3 coef=0.19; Control+recent T2D: time -60 to -24 coef=0.01, time -24 to -3 coef=-0.00; Control+long-standing T2D: time -60 to -3 coef=0.00; Control+no T2D: time -60 to -9 coef=0.00, time -9 to -3 coef=0.02    | Tan 2023    |
| Prostate   | Haemoglobin            | -1 year    |  | Logistic regression stratified by time                 | OR=0.97 (0.89–1.05)                                                                                                                                                                                                                                                                                                                                                                                                                                                                     | Edgren 2010 |
| Prostate   | Haemoglobin            | -1-2 years |  | AUC stratified by time                                 | AUC=0.53 (0.50-0.55)                                                                                                                                                                                                                                                                                                                                                                                                                                                                    | Edgren 2010 |
| Prostate   | Haemoglobin            | -1-2 years |  | Logistic regression stratified by time                 | OR=1.00 (0.93–1.08)                                                                                                                                                                                                                                                                                                                                                                                                                                                                     | Edgren 2010 |
| Prostate   | Haemoglobin            | -2-3 years |  | Logistic regression stratified by time                 | OR=1.00 (0.93–1.08)                                                                                                                                                                                                                                                                                                                                                                                                                                                                     | Edgren 2010 |

|                 |                                |            |  |                                                  |                                                                                                                                                                                                |              |
|-----------------|--------------------------------|------------|--|--------------------------------------------------|------------------------------------------------------------------------------------------------------------------------------------------------------------------------------------------------|--------------|
| Prostate        | Haemoglobin                    | -3-4 years |  | Logistic regression stratified by time           | OR=0.99 (0.92–1.07)                                                                                                                                                                            | Edgren 2010  |
| Prostate        | Haemoglobin                    | -4-5 years |  | Logistic regression stratified by time           | OR=0.98 (0.91–1.05)                                                                                                                                                                            | Edgren 2010  |
| Renal cell      | Erythrocyte sedimentation rate | Diagnosis  |  | Linear regression including repeated blood tests | Method: Linear regression including repeated blood tests. Result: No coefficients were presented. They only presented the linear regression line of best fit for cases and controls separately | Iversen 1996 |
| Small intestine | Haemoglobin                    | -1 year    |  | Logistic regression stratified by time           | OR=1.59 (1.05–2.39)                                                                                                                                                                            | Edgren 2010  |
| Small intestine | Haemoglobin                    | -1-2 years |  | AUC stratified by time                           | AUC=0.56 (0.45-0.67)                                                                                                                                                                           | Edgren 2010  |
| Small intestine | Haemoglobin                    | -1-2 years |  | Logistic regression stratified by time           | OR=1.56 (1.04–2.34)                                                                                                                                                                            | Edgren 2010  |
| Small intestine | Haemoglobin                    | -2-3 years |  | Logistic regression stratified by time           | OR=0.97 (0.66–1.43)                                                                                                                                                                            | Edgren 2010  |
| Small intestine | Haemoglobin                    | -3-4 years |  | Logistic regression stratified by time           | OR=0.87 (0.59–1.28)                                                                                                                                                                            | Edgren 2010  |
| Small intestine | Haemoglobin                    | -4-5 years |  | Logistic regression stratified by time           | OR=1.17 (0.78–1.74)                                                                                                                                                                            | Edgren 2010  |
| Stomach         | Haemoglobin                    | -1 year    |  | Logistic regression stratified by time           | OR=1.57 (1.31–1.88)                                                                                                                                                                            | Edgren 2010  |
| Stomach         | Haemoglobin                    | -1-2 years |  | AUC stratified by time                           | AUC=0.59 (0.55-0.64)                                                                                                                                                                           | Edgren 2010  |
| Stomach         | Haemoglobin                    | -1-2 years |  | Logistic regression stratified by time           | OR=1.32 (1.11–1.58)                                                                                                                                                                            | Edgren 2010  |

|         |                             |            |  |                                        |                                                                                                                                                              |              |
|---------|-----------------------------|------------|--|----------------------------------------|--------------------------------------------------------------------------------------------------------------------------------------------------------------|--------------|
| Stomach | Haemoglobin                 | -2-3 years |  | Logistic regression stratified by time | OR=1.29 (1.09–1.54)                                                                                                                                          | Edgren 2010  |
| Stomach | Haemoglobin                 | -3-4 years |  | Logistic regression stratified by time | OR=1.09 (0.92–1.29)                                                                                                                                          | Edgren 2010  |
| Stomach | Haemoglobin                 | -4-5 years |  | Logistic regression stratified by time | OR=1.08 (0.91–1.28)                                                                                                                                          | Edgren 2010  |
| Thyroid | Thyroid Stimulating Hormone | Diagnosis  |  | Unclear                                | Method: Unclear. Result: Mean TSH over time does not statistically significantly differ in cases up to diagnosis (p=0.57). This was not assessed in controls | Rinaldi 2014 |

<sup>1</sup>Risk window is the outcome time frame. “Diagnosis” means studied analysed trends until diagnosis. Positive numbers mean the study analysed trend and predicted subsequent cancer risk, e.g. “3 years” means three-year risk following trend. Negative numbers mean the study analysed trend prior to diagnosis, e.g. “-1-2 years” means 1-2 years of trend prior to diagnosis.

**Table S8: Cancer outcome details per study**

| Article         | Blood test trend analysed                                                                                                           | Cancer outcome       | Risk window start | Risk window end | Number of patients diagnosed |
|-----------------|-------------------------------------------------------------------------------------------------------------------------------------|----------------------|-------------------|-----------------|------------------------------|
| Atkin 2020      | Calcium adjusted, Creatinine, Haematocrit, Haemoglobin                                                                              | Multiple myeloma=yes | Diagnosis         | Diagnosis       | yes=285                      |
| Boursi 2016     | Albumin, Blood glucose, Calcium, Haematocrit, Mean cell haemoglobin, Mean cell volume, Red blood cell count, White blood cell count | Colorectal=yes/no    | Diagnosis         | Unclear         | yes=9299; no=36199           |
| Chaturvedi 2010 | C-reactive protein                                                                                                                  | Lung=yes/no          | First blood test  | 1 year          |                              |
|                 |                                                                                                                                     |                      | First blood test  | 1-2 years       |                              |
|                 |                                                                                                                                     |                      | First blood test  | 2-5 years       |                              |
|                 |                                                                                                                                     |                      | First blood test  | 5+ years        |                              |
|                 |                                                                                                                                     |                      | First blood test  | Diagnosis       | yes=670; no=592              |
| Edgren 2010     | Haemoglobin                                                                                                                         | Cancer=yes/no        | Diagnosis         | Diagnosis       | yes=16375; no=161995         |
|                 |                                                                                                                                     |                      | Diagnosis         | -1 year         |                              |
|                 |                                                                                                                                     |                      | Diagnosis         | -1-2 years      |                              |
|                 |                                                                                                                                     |                      | Diagnosis         | -2-3 years      |                              |
|                 |                                                                                                                                     |                      | Diagnosis         | -3-4 years      |                              |
|                 |                                                                                                                                     |                      | Diagnosis         | -4-5 years      |                              |
|                 |                                                                                                                                     | Breast=yes/no        | Diagnosis         | -1 year         |                              |

|                           |           |            |  |
|---------------------------|-----------|------------|--|
|                           | Diagnosis | -1-2 years |  |
|                           | Diagnosis | -2-3 years |  |
|                           | Diagnosis | -3-4 years |  |
|                           | Diagnosis | -4-5 years |  |
| Colon=yes/no              | Diagnosis | -1 year    |  |
|                           | Diagnosis | -1-2 years |  |
|                           | Diagnosis | -2-3 years |  |
|                           | Diagnosis | -3-4 years |  |
|                           | Diagnosis | -4-5 years |  |
| Hodgkin lymphoma=yes/no   | Diagnosis | -1 year    |  |
|                           | Diagnosis | -1-2 years |  |
|                           | Diagnosis | -2-3 years |  |
|                           | Diagnosis | -3-4 years |  |
|                           | Diagnosis | -4-5 years |  |
| Lymphatic leukemia=yes/no | Diagnosis | -1 year    |  |
|                           | Diagnosis | -1-2 years |  |
|                           | Diagnosis | -2-3 years |  |
|                           | Diagnosis | -3-4 years |  |
|                           | Diagnosis | -4-5 years |  |
| Multiple myeloma=yes/no   | Diagnosis | -1 year    |  |

|                                   |           |            |  |
|-----------------------------------|-----------|------------|--|
|                                   | Diagnosis | -1-2 years |  |
|                                   | Diagnosis | -2-3 years |  |
|                                   | Diagnosis | -3-4 years |  |
|                                   | Diagnosis | -4-5 years |  |
| Myeloid/monocytic leukemia=yes/no | Diagnosis | -1 year    |  |
|                                   | Diagnosis | -1-2 years |  |
|                                   | Diagnosis | -2-3 years |  |
|                                   | Diagnosis | -3-4 years |  |
|                                   | Diagnosis | -4-5 years |  |
| Non-Hodgkin lymphoma=yes/no       | Diagnosis | -1 year    |  |
|                                   | Diagnosis | -1-2 years |  |
|                                   | Diagnosis | -2-3 years |  |
|                                   | Diagnosis | -3-4 years |  |
|                                   | Diagnosis | -4-5 years |  |
| Oesophagus=yes/no                 | Diagnosis | -1 year    |  |
|                                   | Diagnosis | -1-2 years |  |
|                                   | Diagnosis | -2-3 years |  |
|                                   | Diagnosis | -3-4 years |  |
|                                   | Diagnosis | -4-5 years |  |
| Prostate=yes/no                   | Diagnosis | -1 year    |  |

|                 |                        |                        |                 |            |                    |
|-----------------|------------------------|------------------------|-----------------|------------|--------------------|
|                 |                        |                        | Diagnosis       | -1-2 years |                    |
|                 |                        |                        | Diagnosis       | -2-3 years |                    |
|                 |                        |                        | Diagnosis       | -3-4 years |                    |
|                 |                        |                        | Diagnosis       | -4-5 years |                    |
|                 |                        | Small intestine=yes/no | Diagnosis       | -1 year    |                    |
|                 |                        |                        | Diagnosis       | -1-2 years |                    |
|                 |                        |                        | Diagnosis       | -2-3 years |                    |
|                 |                        |                        | Diagnosis       | -3-4 years |                    |
|                 |                        |                        | Diagnosis       | -4-5 years |                    |
|                 |                        | Stomach=yes/no         | Diagnosis       | -1 year    |                    |
|                 |                        |                        | Diagnosis       | -1-2 years |                    |
|                 |                        |                        | Diagnosis       | -2-3 years |                    |
|                 |                        |                        | Diagnosis       | -3-4 years |                    |
|                 |                        |                        | Diagnosis       | -4-5 years |                    |
| Feng 2020       | Fasting glucose        | Cancer=yes/no          | Last blood test | 6 years    | yes=1364; no=68378 |
|                 |                        | GI cancer=yes/no       | Last blood test | 6 years    | yes=472; no=69270  |
| Fuente 2019     | Monocyte count         | Pancreatic=yes/no      | Diagnosis       | Diagnosis  | yes=219; no=438    |
| Furukawa 1984   | Aspartate transaminase | Liver=yes/no           | Unclear         | Diagnosis  | yes=29; no=85      |
| Giannakeas 2022 | Platelet count         | Breast=yes             | Diagnosis       | Diagnosis  | yes=57012          |
|                 |                        | Colon=yes              | Diagnosis       | Diagnosis  | yes=45461          |



|                 |                                                                                                                          |                                     |             |           |                    |
|-----------------|--------------------------------------------------------------------------------------------------------------------------|-------------------------------------|-------------|-----------|--------------------|
|                 |                                                                                                                          | Lung=yes                            | Diagnosis   | Diagnosis | yes=71427          |
|                 |                                                                                                                          | Ovarian=yes                         | Diagnosis   | Diagnosis | yes=6451           |
|                 |                                                                                                                          | Prostate=yes                        | Diagnosis   | Diagnosis | yes=55567          |
|                 |                                                                                                                          | Stomach=yes                         | Diagnosis   | Diagnosis | yes=7118           |
| Goldshtein 2010 | Haemoglobin                                                                                                              | Colorectal=yes/no                   | Diagnosis   | Diagnosis | yes=1074; no=10740 |
| Gradel 2020     | Albumin, C-reactive protein                                                                                              | Acute myeloid leukaemia=yes         | Diagnosis   | Diagnosis |                    |
| Hauser 2021     | Basophil %                                                                                                               | Chronic myelogenous leukemia=yes/no | Diagnosis   | Diagnosis | yes=100; no=1523   |
| Hsieh 2019      | Platelet count                                                                                                           | Hematologic malignancy=yes          | Unclear     | Unclear   | yes=85             |
| Huang 2020      | Fasting glucose, HbA1C                                                                                                   | Pancreatic=yes/no                   | Study entry | 3 years   | yes=306; no=110393 |
| Iversen 1996    | Erythrocyte sedimentation rate                                                                                           | Renal cell=yes/no                   | Diagnosis   | Diagnosis | yes=236; no=3910   |
| Jacobson 2021   | Fasting glucose                                                                                                          | Pancreatic=yes/no                   | Diagnosis   | Diagnosis | yes=182; no=717    |
| Jonsson 2020    | Creatinine, Urea                                                                                                         | Glioma=yes/no                       | Diagnosis   | Diagnosis | yes=64; no=64      |
| Koshiraris 2018 | C-reactive protein, Calcium, Creatinine, Erythrocyte sedimentation rate, Haemoglobin, Mean cell volume, Plasma viscosity | Multiple myeloma=yes/no             | Diagnosis   | Diagnosis | yes=2703; no=12157 |
| Kubo 2016       | Alanine aminotransaminase, Aspartate transaminase                                                                        | Cholangiocarcinoma (bile duct)=yes  | Diagnosis   | Diagnosis | yes=9              |
| Lemanska 2022   | HbA1C                                                                                                                    | Pancreatic=yes/no                   | Diagnosis   | Diagnosis | yes=8777; no=34979 |
| Li 2021         | Haemoglobin                                                                                                              | Colorectal=yes/no                   | Diagnosis   | Diagnosis | yes=1534; no=15333 |
| Pannala 2009    | Fasting glucose                                                                                                          | Pancreatic=yes/no                   | Diagnosis   | Diagnosis | yes=736; no=1875   |

|                 |                                                                                         |                   |                  |              |                      |
|-----------------|-----------------------------------------------------------------------------------------|-------------------|------------------|--------------|----------------------|
| Rinaldi 2014    | Thyroid Stimulating Hormone                                                             | Thyroid=yes/no    | Diagnosis        | Diagnosis    | yes=357; no=767      |
| Sadr-Azodi 2015 | HbA1C                                                                                   | Pancreatic=yes/no | Diagnosis        | -0-6 months  | yes=57; no=570       |
|                 |                                                                                         |                   | Diagnosis        | -1-2 years   | yes=69; no=690       |
|                 |                                                                                         |                   | Diagnosis        | -2-5 years   | yes=143; no=1428     |
|                 |                                                                                         |                   | Diagnosis        | -5+ years    | yes=78; no=779       |
|                 |                                                                                         |                   | Diagnosis        | -6-12 months | yes=44; no=440       |
| Sharma 2018     | Fasting glucose                                                                         | Pancreatic=yes/no | Diagnosis        | Diagnosis    | yes=219; no=440      |
|                 |                                                                                         |                   | Diagnosis        | -0-6m        | yes=159; no=123      |
|                 |                                                                                         |                   | Diagnosis        | -6-12m       | yes=88; no=93        |
|                 |                                                                                         |                   | Diagnosis        | -12-18m      | yes=90; no=123       |
|                 |                                                                                         |                   | Diagnosis        | -18-24m      | yes=69; no=86        |
|                 |                                                                                         |                   | Diagnosis        | -24-30m      | yes=71; no=128       |
|                 |                                                                                         |                   | Diagnosis        | -30-36m      | yes=68; no=116       |
|                 |                                                                                         |                   | Diagnosis        | -36-42m      | yes=61; no=125       |
|                 |                                                                                         |                   | Diagnosis        | -42-48m      | yes=60; no=99        |
|                 |                                                                                         |                   | Diagnosis        | -48-54m      | yes=72; no=122       |
|                 |                                                                                         |                   | Diagnosis        | -54-60m      | yes=81; no=106       |
| Stroud 2020     | Blood glucose                                                                           | Cancer=yes/no     | First blood test | 7 years      | yes=82; no=2025      |
| Tan 2023        | Alanine aminotransaminase,<br>Aspartate transaminase,<br>Bilirubin, Haemoglobin, HbA1C, | Pancreatic=yes/no | Diagnosis        | Diagnosis    | yes=28137; no=261219 |

|              |                                                                                                                                                                                                                                                                                  |                   |                  |           |                      |
|--------------|----------------------------------------------------------------------------------------------------------------------------------------------------------------------------------------------------------------------------------------------------------------------------------|-------------------|------------------|-----------|----------------------|
|              | Platelet count, White blood cell count                                                                                                                                                                                                                                           |                   |                  |           |                      |
| Toriola 2011 | C-reactive protein                                                                                                                                                                                                                                                               | Ovarian=yes       | Diagnosis        | Diagnosis | yes=170; no=170      |
| Toriola 2013 | C-reactive protein                                                                                                                                                                                                                                                               | Colorectal=yes/no | First blood test | Unclear   | yes=766; no=875      |
| Virdee 2022  | Basophil count, Eosinophil count, Haematocrit, Haemoglobin, Lymphocyte count, Mean cell haemoglobin, Mean cell haemoglobin concentration, Mean cell volume, Mean platelet volume, Monocyte count, Neutrophil count, Platelet count, Red blood cell count, White blood cell count | Colorectal=yes/no | Diagnosis        | Diagnosis | yes=17408; no=541646 |

**Table S9: Description of graphical blood test trend by cancer site**

| Cancer site                    | Risk window <sup>1</sup> | Blood level               | Strata (if applicable) | Description of graphical trend                                                                         | Article         |
|--------------------------------|--------------------------|---------------------------|------------------------|--------------------------------------------------------------------------------------------------------|-----------------|
| Acute myeloid leukaemia        | Diagnosis                | Albumin                   |                        | Cases: remained steady                                                                                 | Gradel 2020     |
| Acute myeloid leukaemia        | Diagnosis                | C-reactive protein        |                        | Cases: remained steady (only trends within 30 days before diagnosis shown)                             | Gradel 2020     |
| Breast                         | Diagnosis                | Haemoglobin               |                        | No difference between cases and non-cases                                                              | Edgren 2010     |
| Breast                         | Diagnosis                | Platelet count            |                        | Cases: remained steady                                                                                 | Giannakeas 2022 |
| Cancer                         | Diagnosis                | Haemoglobin               |                        | Cases: decline at 1 year before diagnosis. Non-cases: remained steady                                  | Edgren 2010     |
| Cholangiocarcinoma (bile duct) | Diagnosis                | Alanine aminotransaminase |                        | Cases: increases slightly at 2 years before diagnosis                                                  | Kubo 2016       |
| Cholangiocarcinoma (bile duct) | Diagnosis                | Aspartate transaminase    |                        | Cases: increases slightly at 2 years before diagnosis                                                  | Kubo 2016       |
| Chronic myelogenous leukemia   | Diagnosis                | Basophil %                |                        | Cases: increases slightly at 1 year before diagnosis                                                   | Hauser 2021     |
| Colon                          | Diagnosis                | Haemoglobin               |                        | Cases: decline at 2 year before diagnosis. Non-cases: remained steady                                  | Edgren 2010     |
| Colon                          | Diagnosis                | Platelet count            |                        | Cases: increases at 1 year before diagnosis, with an increasing rate of change as diagnosis approaches | Giannakeas 2022 |
| Colorectal                     | Diagnosis                | Basophil count            | Females                | No difference between cases and non-cases                                                              | Virdee 2022     |
| Colorectal                     | Diagnosis                | Basophil count            | Males                  | No difference between cases and non-cases                                                              | Virdee 2022     |
| Colorectal                     | Diagnosis                | Eosinophil count          | Females                | No difference between cases and non-cases                                                              | Virdee 2022     |

|            |           |                                     |         |                                                                                                                                      |                 |
|------------|-----------|-------------------------------------|---------|--------------------------------------------------------------------------------------------------------------------------------------|-----------------|
| Colorectal | Diagnosis | Eosinophil count                    | Males   | No difference between cases and non-cases                                                                                            | Virdee 2022     |
| Colorectal | Diagnosis | Haematocrit/Packed cell volume      | Females | Cases: declined at 3 years before diagnosis, with an increasing rate of decline as diagnosis approaches. Non-cases: remained steady  | Virdee 2022     |
| Colorectal | Diagnosis | Haematocrit/Packed cell volume      | Males   | Cases: declined at 3 years before diagnosis, with an increasing rate of decline as diagnosis approaches. Non-cases: remained steady  | Virdee 2022     |
| Colorectal | Diagnosis | Haemoglobin                         |         | Cases: declines at 4 years before diagnosis, with an increasing rate of decline as diagnosis approaches. Non-cases: remained steady  | Goldshtein 2010 |
| Colorectal | Diagnosis | Haemoglobin                         |         | Cases: decline at 2-3 years before diagnosis, with an increasing rate of decline as diagnosis approached. Non-cases: remained steady | Li 2021         |
| Colorectal | Diagnosis | Haemoglobin                         | Females | Cases: declined at 5 years before diagnosis, with an increasing rate of decline as diagnosis approaches. Non-cases: remained steady  | Virdee 2022     |
| Colorectal | Diagnosis | Haemoglobin                         | Males   | Cases: declined at 5 years before diagnosis, with an increasing rate of decline as diagnosis approaches. Non-cases: remained steady  | Virdee 2022     |
| Colorectal | Diagnosis | Lymphocyte count                    | Females | Cases: declines slightly at 6 months before diagnosis. Non-cases: remained steady                                                    | Virdee 2022     |
| Colorectal | Diagnosis | Lymphocyte count                    | Males   | Cases: declines slightly at 6 months before diagnosis. Non-cases: remained steady                                                    | Virdee 2022     |
| Colorectal | Diagnosis | Mean cell haemoglobin               | Females | Cases: declined at 3 years before diagnosis, with an increasing rate of decline as diagnosis approaches. Non-cases: remained steady  | Virdee 2022     |
| Colorectal | Diagnosis | Mean cell haemoglobin               | Males   | Cases: declined at 3 years before diagnosis, with an increasing rate of decline as diagnosis approaches. Non-cases: remained steady  | Virdee 2022     |
| Colorectal | Diagnosis | Mean cell haemoglobin concentration | Females | Cases: declined at 3 years before diagnosis, with an increasing rate of decline as diagnosis approaches. Non-cases: remained steady  | Virdee 2022     |

|            |           |                                     |         |                                                                                                                                     |             |
|------------|-----------|-------------------------------------|---------|-------------------------------------------------------------------------------------------------------------------------------------|-------------|
| Colorectal | Diagnosis | Mean cell haemoglobin concentration | Males   | Cases: declined at 3 years before diagnosis, with an increasing rate of decline as diagnosis approaches. Non-cases: remained steady | Virdee 2022 |
| Colorectal | Diagnosis | Mean cell volume                    | Females | Cases: declined at 4 years before diagnosis, with an increasing rate of decline as diagnosis approaches. Non-cases: remained steady | Virdee 2022 |
| Colorectal | Diagnosis | Mean cell volume                    | Males   | Cases: declined at 4 years before diagnosis, with an increasing rate of decline as diagnosis approaches. Non-cases: remained steady | Virdee 2022 |
| Colorectal | Diagnosis | Mean platelet volume                | Females | Cases: declines slightly at 6 months before diagnosis. Non-cases: remained steady                                                   | Virdee 2022 |
| Colorectal | Diagnosis | Mean platelet volume                | Males   | Cases: declines slightly at 6 months before diagnosis. Non-cases: remained steady                                                   | Virdee 2022 |
| Colorectal | Diagnosis | Monocyte count                      | Females | Cases: increases at 1 year before diagnosis, with an increasing rate of change as diagnosis approaches. Non-cases: remained steady  | Virdee 2022 |
| Colorectal | Diagnosis | Monocyte count                      | Males   | Cases: increases at 1 year before diagnosis, with an increasing rate of change as diagnosis approaches. Non-cases: remained steady  | Virdee 2022 |
| Colorectal | Diagnosis | Neutrophil count                    | Females | Cases: increases at 3 years before diagnosis, with an increasing rate of change as diagnosis approaches. Non-cases: remained steady | Virdee 2022 |
| Colorectal | Diagnosis | Neutrophil count                    | Males   | Cases: increases at 3 years before diagnosis, with an increasing rate of change as diagnosis approaches. Non-cases: remained steady | Virdee 2022 |
| Colorectal | Diagnosis | Platelet count                      | Females | Cases: increases at 4 years before diagnosis, with an increasing rate of change as diagnosis approaches. Non-cases: remained steady | Virdee 2022 |
| Colorectal | Diagnosis | Platelet count                      | Males   | Cases: increases at 4 years before diagnosis, with an increasing rate of change as diagnosis approaches. Non-cases: remained steady | Virdee 2022 |
| Colorectal | Diagnosis | Red blood cell count                | Females | Cases: declined at 3 years before diagnosis, with an increasing rate of decline as diagnosis approaches. Non-cases: remained steady | Virdee 2022 |

|                        |           |                                |         |                                                                                                                                                   |                 |
|------------------------|-----------|--------------------------------|---------|---------------------------------------------------------------------------------------------------------------------------------------------------|-----------------|
| Colorectal             | Diagnosis | Red blood cell count           | Males   | Cases: declined at 3 years before diagnosis, with an increasing rate of decline as diagnosis approaches. Non-cases: remained steady               | Virdee 2022     |
| Colorectal             | Diagnosis | White blood cell count         | Females | Cases: increases at 2 years before diagnosis, with an increasing rate of change as diagnosis approaches. Non-cases: remained steady               | Virdee 2022     |
| Colorectal             | Diagnosis | White blood cell count         | Males   | Cases: increases at 2 years before diagnosis, with an increasing rate of change as diagnosis approaches. Non-cases: remained steady               | Virdee 2022     |
| Hematologic malignancy | Unclear   | Platelet count                 |         | Cases: remained steady                                                                                                                            | Hsieh 2019      |
| Hodgkin lymphoma       | Diagnosis | Haemoglobin                    |         | Cases: decline at 4 years before diagnosis. Non-cases: remained steady                                                                            | Edgren 2010     |
| Lung                   | Diagnosis | Platelet count                 |         | Cases: increases at 9 months before diagnosis, with an increasing rate of change at 3 months before diagnosis                                     | Giannakeas 2022 |
| Lymphatic leukemia     | Diagnosis | Haemoglobin                    |         | Cases: decline at 3 years before diagnosis. Non-cases: remained steady                                                                            | Edgren 2010     |
| Multiple myeloma       | Diagnosis | C-reactive protein             |         | No difference between cases and non-cases                                                                                                         | Koshiaris 2018  |
| Multiple myeloma       | Diagnosis | Calcium                        |         | Cases: increases slightly at 1 year before diagnosis, with an increasing rate of change at 6 months before diagnosis. Non-cases: remained steady  | Koshiaris 2018  |
| Multiple myeloma       | Diagnosis | Calcium adjusted               |         | Cases: increases at 90 days before diagnosis                                                                                                      | Atkin 2020      |
| Multiple myeloma       | Diagnosis | Creatinine                     |         | Cases: increases at 90 days before diagnosis                                                                                                      | Atkin 2020      |
| Multiple myeloma       | Diagnosis | Creatinine                     |         | Cases: increases slightly at 1 year before diagnosis, with an increasing rate of change at 6 months before diagnosis. Non-cases: remained steady  | Koshiaris 2018  |
| Multiple myeloma       | Diagnosis | Erythrocyte sedimentation rate |         | Cases: increases slightly at 2 years before diagnosis, with an increasing rate of change at 9 months before diagnosis. Non-cases: remained steady | Koshiaris 2018  |
| Multiple myeloma       | Diagnosis | Haematocrit/Packed cell volume |         | Cases: decline at 2 years before diagnosis                                                                                                        | Atkin 2020      |

|                            |             |                  |         |                                                                                                                                             |                 |
|----------------------------|-------------|------------------|---------|---------------------------------------------------------------------------------------------------------------------------------------------|-----------------|
| Multiple myeloma           | Diagnosis   | Haemoglobin      |         | Cases: decline at 2 years before diagnosis                                                                                                  | Atkin 2020      |
| Multiple myeloma           | Diagnosis   | Haemoglobin      |         | Cases: decline at 4 years before diagnosis, with an increasing rate of decline from 1 year before diagnosis. Non-cases: remained steady     | Edgren 2010     |
| Multiple myeloma           | Diagnosis   | Haemoglobin      | Females | Cases: decline at 3 years before diagnosis, with an increasing rate of decline as diagnosis approached. Non-cases: remained steady          | Koshiaris 2018  |
| Multiple myeloma           | Diagnosis   | Haemoglobin      | Males   | Cases: decline at 3 years before diagnosis, with an increasing rate of decline as diagnosis approached. Non-cases: remained steady          | Koshiaris 2018  |
| Multiple myeloma           | Diagnosis   | Mean cell volume |         | Cases: increases slightly at 1 year before diagnosis. Non-cases: remained steady                                                            | Koshiaris 2018  |
| Multiple myeloma           | Diagnosis   | Plasma viscosity |         | Cases: increases slightly at 1 year before diagnosis, with an increasing rate of change as diagnosis approached. Non-cases: remained steady | Koshiaris 2018  |
| Myeloid/monocytic leukemia | Diagnosis   | Haemoglobin      |         | Cases: decline at 1 year before diagnosis. Non-cases: remained steady                                                                       | Edgren 2010     |
| Non-Hodgkin lymphoma       | Diagnosis   | Haemoglobin      |         | Cases: decline at 3 years before diagnosis. Non-cases: remained steady                                                                      | Edgren 2010     |
| Oesophagus                 | Diagnosis   | Haemoglobin      |         | Cases: decline at 5 year before diagnosis. Non-cases: remained steady                                                                       | Edgren 2010     |
| Ovarian                    | Diagnosis   | Platelet count   |         | Cases: increases at 9 months before diagnosis, with an increasing rate of change at 3 months before diagnosis                               | Giannakeas 2022 |
| Pancreatic                 | -0-6 months | HbA1C            |         | Cases: increases at 2-3 years before diagnosis. Non-cases: remained steady                                                                  | Sadr-Azodi 2015 |
| Pancreatic                 | -0-6m       | Fasting glucose  |         | Cases: increases at 3 years before diagnosis, with an increasing rate of change at 1 year before diagnosis. Non-cases: remained steady      | Sharma 2018     |
| Pancreatic                 | -1-2 years  | HbA1C            |         | Cases: increases at 2-3 years before diagnosis. Non-cases: remained steady                                                                  | Sadr-Azodi 2015 |



|            |              |                 |  |                                                                                                                                        |                 |
|------------|--------------|-----------------|--|----------------------------------------------------------------------------------------------------------------------------------------|-----------------|
| Pancreatic | -12-18m      | Fasting glucose |  | Cases: increases at 3 years before diagnosis, with an increasing rate of change at 1 year before diagnosis. Non-cases: remained steady | Sharma 2018     |
| Pancreatic | -18-24m      | Fasting glucose |  | Cases: increases at 3 years before diagnosis, with an increasing rate of change at 1 year before diagnosis. Non-cases: remained steady | Sharma 2018     |
| Pancreatic | -2-5 years   | HbA1C           |  | Cases: increases at 2-3 years before diagnosis. Non-cases: remained steady                                                             | Sadr-Azodi 2015 |
| Pancreatic | -24-30m      | Fasting glucose |  | Cases: increases at 3 years before diagnosis, with an increasing rate of change at 1 year before diagnosis. Non-cases: remained steady | Sharma 2018     |
| Pancreatic | -30-36m      | Fasting glucose |  | Cases: increases at 3 years before diagnosis, with an increasing rate of change at 1 year before diagnosis. Non-cases: remained steady | Sharma 2018     |
| Pancreatic | -36-42m      | Fasting glucose |  | Cases: increases at 3 years before diagnosis, with an increasing rate of change at 1 year before diagnosis. Non-cases: remained steady | Sharma 2018     |
| Pancreatic | -42-48m      | Fasting glucose |  | Cases: increases at 3 years before diagnosis, with an increasing rate of change at 1 year before diagnosis. Non-cases: remained steady | Sharma 2018     |
| Pancreatic | -48-54m      | Fasting glucose |  | Cases: increases at 3 years before diagnosis, with an increasing rate of change at 1 year before diagnosis. Non-cases: remained steady | Sharma 2018     |
| Pancreatic | -5+ years    | HbA1C           |  | Cases: increases at 2-3 years before diagnosis. Non-cases: remained steady                                                             | Sadr-Azodi 2015 |
| Pancreatic | -54-60m      | Fasting glucose |  | Cases: increases at 3 years before diagnosis, with an increasing rate of change at 1 year before diagnosis. Non-cases: remained steady | Sharma 2018     |
| Pancreatic | -6-12 months | HbA1C           |  | Cases: increases at 2-3 years before diagnosis. Non-cases: remained steady                                                             | Sadr-Azodi 2015 |
| Pancreatic | -6-12m       | Fasting glucose |  | Cases: increases at 3 years before diagnosis, with an increasing rate of change at 1 year before diagnosis. Non-cases: remained steady | Sharma 2018     |

|            |           |                           |  |                                                                                                                                                                                  |               |
|------------|-----------|---------------------------|--|----------------------------------------------------------------------------------------------------------------------------------------------------------------------------------|---------------|
| Pancreatic | 3 years   | Fasting glucose           |  | Cases and non-cases: increases slightly, with a rapid increase at 6 months before diabetes diagnosis, although cases had a higher increase at 6 months before diabetes diagnosis | Huang 2020    |
| Pancreatic | 3 years   | HbA1C                     |  | Cases and non-cases: increases slightly, with a rapid increase at 6 months before diabetes diagnosis, although cases had a higher increase at 6 months before diabetes diagnosis | Huang 2020    |
| Pancreatic | Diagnosis | Alanine aminotransaminase |  | Cases: increases at 6-12 months before diagnosis. Non-cases: remained steady                                                                                                     | Tan 2023      |
| Pancreatic | Diagnosis | Aspartate transaminase    |  | Cases: increases at 6-12 months before diagnosis. Non-cases: remained steady                                                                                                     | Tan 2023      |
| Pancreatic | Diagnosis | Bilirubin                 |  | Cases: increases at 6-12 months before diagnosis. Non-cases: remained steady                                                                                                     | Tan 2023      |
| Pancreatic | Diagnosis | Fasting glucose           |  | Cases: increases at 6 years before diagnosis, with an increasing rate of change 1 year before diagnosis                                                                          | Jacobson 2021 |
| Pancreatic | Diagnosis | Fasting glucose           |  | Cases: increases at 4 years before diagnosis, with an increasing rate of change at 1.5 years before diagnosis. Non-cases: remained steady                                        | Pannala 2009  |
| Pancreatic | Diagnosis | Fasting glucose           |  | Cases: increases at 3 years before diagnosis, with an increasing rate of change at 1 year before diagnosis. Non-cases: remained steady                                           | Sharma 2018   |
| Pancreatic | Diagnosis | Haemoglobin               |  | Cases: declines at 2 years before diagnosis, with an increasing rate of change as diagnosis approaches. Non-cases: remained steady                                               | Tan 2023      |
| Pancreatic | Diagnosis | HbA1C                     |  | Cases: increases at 2 years before diagnosis. Non-cases: remained steady                                                                                                         | Lemanska 2022 |
| Pancreatic | Diagnosis | HbA1C                     |  | Cases: increases at 3 years before diagnosis, with an increasing rate of change as diagnosis approaches. Non-cases: remained steady                                              | Tan 2023      |
| Pancreatic | Diagnosis | Monocyte count            |  | Cases: increase at 1 year before diagnosis. Non-cases: remained steady                                                                                                           | Fuente 2019   |
| Pancreatic | Diagnosis | Platelet count            |  | Cases: increases at 6-12 months before diagnosis. Non-cases: remained steady                                                                                                     | Tan 2023      |

|                 |           |                                |  |                                                                                                                            |                 |
|-----------------|-----------|--------------------------------|--|----------------------------------------------------------------------------------------------------------------------------|-----------------|
| Pancreatic      | Diagnosis | White blood cell count         |  | Cases: increases at 6-12 months before diagnosis. Non-cases: remained steady                                               | Tan 2023        |
| Prostate        | Diagnosis | Haemoglobin                    |  | No difference between cases and non-cases                                                                                  | Edgren 2010     |
| Prostate        | Diagnosis | Platelet count                 |  | Cases: remained steady                                                                                                     | Giannakeas 2022 |
| Renal cell      | Diagnosis | Erythrocyte sedimentation rate |  | Cases: increases at 5 years before diagnosis, with a rapid increase at 1 year before diagnosis. Non-cases: remained steady | Iversen 1996    |
| Small intestine | Diagnosis | Haemoglobin                    |  | Cases: increases at 5 year before diagnosis. Non-cases: remained steady                                                    | Edgren 2010     |
| Stomach         | Diagnosis | Haemoglobin                    |  | Cases: decline at 5 year before diagnosis. Non-cases: remained steady                                                      | Edgren 2010     |
| Stomach         | Diagnosis | Platelet count                 |  | Cases: increases at 9 months before diagnosis, with an increasing rate of change at 3 months before diagnosis              | Giannakeas 2022 |
| Thyroid         | Diagnosis | Thyroid Stimulating Hormone    |  | No difference between cases and non-cases                                                                                  | Rinaldi 2014    |

<sup>1</sup>Risk window is the outcome time frame. “Diagnosis” means studied analysed trends until diagnosis. Positive numbers mean the study analysed trend and predicted subsequent cancer risk, e.g. “3 years” means three-year risk following trend. Negative numbers mean the study analysed trend prior to diagnosis, e.g. “-1-2 years” means 1-2 years of trend prior to diagnosis.

**Table S10: Risk of bias in the 29 studies assessing the association between blood test trend and cancer, assessed using the QUIPS tool**

| Article         | Participation | Attrition | Prognostic factor | Outcome  | Confounders | Analysis & reporting |
|-----------------|---------------|-----------|-------------------|----------|-------------|----------------------|
| Atkin 2020      | High          | Low       | High              | High     | High        | High                 |
| Boursi 2016     | Low           | Low       | High              | Moderate | Moderate    | High                 |
| Chaturvedi 2010 | High          | High      | High              | Moderate | Moderate    | Moderate             |
| Edgren 2010     | Moderate      | Low       | High              | Moderate | High        | Moderate             |
| Feng 2020       | High          | High      | High              | Low      | High        | Low                  |
| Fuente 2019     | Moderate      | Low       | High              | Low      | High        | High                 |
| Furukawa 1984   | High          | High      | High              | Moderate | High        | Moderate             |
| Giannakeas 2022 | High          | Low       | Moderate          | Moderate | High        | High                 |
| Goldshtein 2010 | High          | Low       | Moderate          | Moderate | Moderate    | High                 |
| Gradel 2020     | Moderate      | Low       | High              | Moderate | Moderate    | High                 |
| Hauser 2021     | Moderate      | Moderate  | High              | Moderate | High        | Moderate             |
| Hsieh 2019      | Moderate      | Low       | Moderate          | High     | High        | High                 |
| Huang 2020      | Moderate      | Low       | Low               | Low      | High        | Low                  |

|                 |          |      |          |          |          |          |
|-----------------|----------|------|----------|----------|----------|----------|
| Iversen 1996    | Moderate | High | Low      | Moderate | High     | High     |
| Jacobson 2021   | Moderate | High | High     | Low      | Low      | Moderate |
| Jonsson 2020    | Moderate | High | Low      | Moderate | Moderate | Moderate |
| Koshiaris 2018  | Low      | Low  | Low      | Low      | Low      | Low      |
| Kubo 2016       | High     | Low  | Low      | Low      | High     | Moderate |
| Lemanska 2022   | Low      | Low  | Low      | Low      | Low      | Low      |
| Li 2021         | Moderate | Low  | Low      | Low      | Low      | Moderate |
| Pannala 2009    | Low      | Low  | Low      | Low      | High     | High     |
| Rinaldi 2014    | Low      | High | High     | Low      | Moderate | Low      |
| Sadr-Azodi 2015 | Moderate | Low  | High     | Low      | Moderate | Moderate |
| Sharma 2018     | Moderate | Low  | High     | Low      | High     | Moderate |
| Stroud 2020     | Moderate | High | Low      | Low      | Moderate | Moderate |
| Tan 2023        | Low      | Low  | Moderate | Low      | Low      | Low      |
| Toriola 2011    | High     | Low  | High     | Low      | Moderate | Moderate |
| Toriola 2013    | High     | Low  | High     | Low      | Low      | Low      |
| Virdee 2022     | Low      | Low  | Low      | Low      | Low      | Low      |

|                    |          |          |          |          |          |          |
|--------------------|----------|----------|----------|----------|----------|----------|
| Total low (%)      | 7 (24%)  | 20 (69%) | 10 (34%) | 17 (59%) | 7 (24%)  | 8 (28%)  |
| Total moderate (%) | 13 (45%) | 1 (3%)   | 4 (14%)  | 10 (34%) | 9 (31%)  | 12 (41%) |
| Total high (%)     | 9 (31%)  | 8 (28%)  | 15 (52%) | 2 (7%)   | 13 (45%) | 9 (31%)  |
